# Supplementary material for: Simultaneous formation of helical and sheet-like assemblies from short azapeptides enables spontaneous resolution
Source: Royal Society of Chemistry journal article supplement (doi:10.1039/d4nr02872d), 2024-01-01
Supplement: d4nr02872d1.pdf [file d4nr02872d1.pdf]

# **Simultaneous formation of helical and sheet-like assemblies from short azapeptides enables spontaneous resolution**

Xiaosheng Yan,<sup>\*,[a,b]</sup> Peimin Weng,<sup>[a]</sup> Jinlian Cao,<sup>[a]</sup> Kexin Lin,<sup>[b]</sup>

Yuanwei Qi,<sup>[b]</sup> Xin Wu,<sup>[b]</sup> and Yun-Bao Jiang<sup>\*,[a]</sup>

<sup>[a]</sup> Department of Chemistry, College of Chemistry and Chemical Engineering, The MOE Key Laboratory of Spectrochemical Analysis and Instrumentation, and *iChEM*, Xiamen University, Xiamen 361005, China.

<sup>[b]</sup> Fujian Provincial Key Laboratory of Innovative Drug Target Research and State Key Laboratory of Cellular Stress Biology, School of Pharmaceutical Sciences, Xiamen University, Xiamen, Fujian 361102, China.

\*E-mail: xshyan@xmu.edu.cn; ybjjiang@xmu.edu.cn.

## **Supporting Information**

### **Contents**

|                                                                 |            |
|-----------------------------------------------------------------|------------|
| <b>1. Syntheses and characterizations.....</b>                  | <b>S2</b>  |
| <b>2. Experimental data.....</b>                                | <b>S5</b>  |
| <b>3. <sup>1</sup>H NMR and <sup>13</sup>C NMR spectra.....</b> | <b>S22</b> |
| <b>4. References.....</b>                                       | <b>S30</b> |

## 1. Syntheses and characterizations

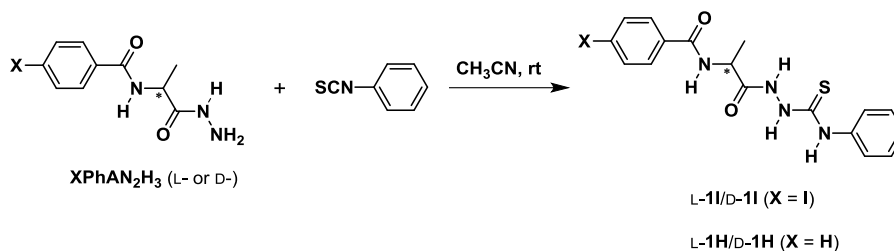

**Scheme S1.** General procedures for the syntheses of **II** and **1H**

Compounds **XPhAN<sub>2</sub>H<sub>3</sub>** (**X = I, H**) were synthesized according to the same procedure as that reported in the literature.<sup>S1</sup>

**1I:** To a CH<sub>3</sub>CN solution (20 mL) of **IPhAN<sub>2</sub>H<sub>3</sub>** (0.50 g, 1.50 mmol), excess phenyl isocyanate (0.5 mL) was added, and the mixture was stirred for 24 h at room temperature. After filtration, the solid was recrystallized in CH<sub>3</sub>CN and dried in vacuum to obtain **1I** (0.60 g, 85% yield).

**1H:** To a CH<sub>3</sub>CN solution (20 mL) of **HPhAN<sub>2</sub>H<sub>3</sub>** (0.40 g, 1.93 mmol), excess phenyl isocyanate (0.6 mL) was added, and the mixture was stirred for 24 h at room temperature. After concentration in vacuum, the solid was washed by Et<sub>2</sub>O, and then recrystallized in CH<sub>3</sub>CN and dried in vacuum to obtain **1H** (0.50 g, yield 75%).

**L-1I:** <sup>1</sup>H NMR (500 MHz, DMSO-*d*<sub>6</sub>):  $\delta$  (ppm) 10.38 (s, 1H), 9.72 (s, 1H), 9.25 (s, 1H), 8.97 (s, 1H), 7.89 (d, *J* = 8.3 Hz, 2H), 7.66 (dd, *J* = 16.5, 7.5 Hz, 4H), 7.35 (t, *J* = 7.8 Hz, 2H), 7.16 (t, *J* = 7.3 Hz, 1H), 4.32 (s, 1H), 1.40 (d, *J* = 7.0 Hz, 3H); <sup>13</sup>C NMR (151 MHz, DMSO-*d*<sub>6</sub>):  $\delta$  (ppm) 180.13, 171.76, 166.85, 139.00, 137.17, 132.75, 129.56, 128.15, 124.82, 124.09, 99.50, 49.17, 16.54; HRMS (ESI): calcd for [C<sub>17</sub>H<sub>17</sub>IN<sub>4</sub>NaO<sub>2</sub>S]<sup>+</sup>: 491.0015, found: 491.0005.

**D-1I:** <sup>1</sup>H NMR (500 MHz, DMSO-*d*<sub>6</sub>):  $\delta$  (ppm) 10.38 (s, 1H), 9.71 (s, 1H), 9.26 (s, 1H), 8.98 (s, 1H), 7.89 (d, *J* = 7.2 Hz, 2H), 7.76 – 7.53 (m, 4H), 7.42 – 7.28 (m, 2H), 7.20 – 7.11 (m, 1H), 4.33 (s, 1H), 1.39 (d, *J* = 6.3 Hz, 3H); <sup>13</sup>C NMR (151 MHz, DMSO-*d*<sub>6</sub>):  $\delta$  (ppm) 180.16, 171.77, 166.85, 139.01, 137.17, 132.75, 129.56, 128.15, 124.83, 124.10, 99.50, 49.15, 16.56; HRMS (ESI): calcd for [C<sub>17</sub>H<sub>17</sub>IN<sub>4</sub>NaO<sub>2</sub>S]<sup>+</sup>: 491.0015, found: 491.0007.

**L-1H:** <sup>1</sup>H NMR (500 MHz, DMSO-*d*<sub>6</sub>):  $\delta$  (ppm)  $\delta$  10.41 (s, 1H), 9.72 (s, 1H), 9.31 (s, 1H), 8.92 (s, 1H), 7.90 (d, *J* = 7.5 Hz, 2H), 7.68 (d, *J* = 5.6 Hz, 2H), 7.56 (t, *J* = 7.3 Hz, 1H), 7.49 (t, *J* = 7.5 Hz, 2H), 7.35 (t, *J* = 7.7 Hz, 2H), 7.16 (t, *J* = 7.1 Hz, 1H), 4.32 (s, 1H), 1.41 (d, *J* = 7.0 Hz, 3H); <sup>13</sup>C NMR (214 MHz, CD<sub>3</sub>CN):  $\delta$  (ppm) 182.78, 173.06, 169.63, 139.81, 134.12, 133.05, 129.51,

129.34, 128.45, 126.59, 125.61, 51.15, 16.76; HRMS (ESI): calcd for  $[C_{17}H_{18}N_4NaO_2S]^+$ : 365.1048, found: 365.1043.

**D-1H**:  $^1H$  NMR (500 MHz, DMSO- $d_6$ ):  $\delta$  (ppm) 10.40 (s, 1H), 9.72 (s, 1H), 9.31 (s, 1H), 8.92 (s, 1H), 7.90 (d,  $J = 7.8$  Hz, 2H), 7.68 (d,  $J = 6.0$  Hz, 2H), 7.56 (t,  $J = 7.3$  Hz, 1H), 7.48 (t,  $J = 7.5$  Hz, 2H), 7.35 (t,  $J = 7.6$  Hz, 2H), 7.16 (t,  $J = 6.8$  Hz, 1H), 4.33 (s, 1H), 1.41 (d,  $J = 7.1$  Hz, 3H);  $^{13}C$  NMR (214 MHz,  $CD_3CN$ ):  $\delta$  (ppm) 182.79, 173.06, 169.63, 139.81, 134.13, 133.06, 129.51, 129.34, 128.45, 126.59, 125.61, 51.16, 16.76; HRMS (ESI): calcd for  $[C_{17}H_{18}N_4NaO_2S]^+$ : 365.1048, found: 365.1040.

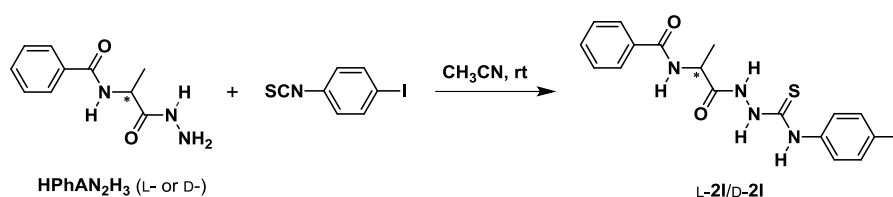

**Scheme S2.** General procedures for the syntheses of **2I**

**2I**: To a  $CH_3CN$  solution (20 mL) of **HPhAN<sub>2</sub>H<sub>3</sub>** (0.40 g, 1.93 mmol), 4-iodophenyl isocyanate (0.55 g, 2.11 mmol) was added, and the mixture was stirred for 24 h at room temperature. After concentration in vacuum, the solid was washed by  $Et_2O$ , and then recrystallized in  $CH_3CN$  and dried in vacuum to obtain **2I** (0.71 g, yield 79%).

**L-2I**:  $^1H$  NMR (500 MHz, DMSO- $d_6$ ):  $\delta$  (ppm) 10.43 (s, 1H), 9.85 (s, 1H), 9.33 (s, 1H), 8.95 (s, 1H), 7.91 (d,  $J = 7.4$  Hz, 2H), 7.70 (d,  $J = 8.3$  Hz, 2H), 7.65 – 7.52 (m, 3H), 7.50 (t,  $J = 7.5$  Hz, 2H), 4.30 (s, 1H), 1.41 (d,  $J = 6.9$  Hz, 3H);  $^{13}C$  NMR (214 MHz, DMSO- $d_6$ ):  $\delta$  (ppm) 179.99, 171.92, 167.68, 138.99, 136.82, 133.18, 131.77, 128.31, 127.65, 126.01, 89.18, 49.25, 16.48; HRMS (ESI): calcd for  $[C_{17}H_{17}IN_4NaO_2S]^+$ : 491.0015, found: 491.0012.

**D-2I**:  $^1H$  NMR (500 MHz, DMSO- $d_6$ ):  $\delta$  (ppm) 10.43 (s, 1H), 9.84 (s, 1H), 9.33 (s, 1H), 8.95 (s, 1H), 7.91 (d,  $J = 7.4$  Hz, 2H), 7.70 (d,  $J = 8.2$  Hz, 2H), 7.66 – 7.52 (m, 3H), 7.49 (t,  $J = 7.4$  Hz, 2H), 4.31 (s, 1H), 1.41 (d,  $J = 6.8$  Hz, 3H);  $^{13}C$  NMR (214 MHz, DMSO- $d_6$ ):  $\delta$  (ppm) 180.02, 171.97, 167.73, 139.01, 136.85, 133.18, 131.79, 128.33, 127.67, 126.05, 89.21, 49.31, 16.51; HRMS (ESI): calcd for  $[C_{17}H_{17}IN_4NaO_2S]^+$ : 491.0015, found: 491.0013.

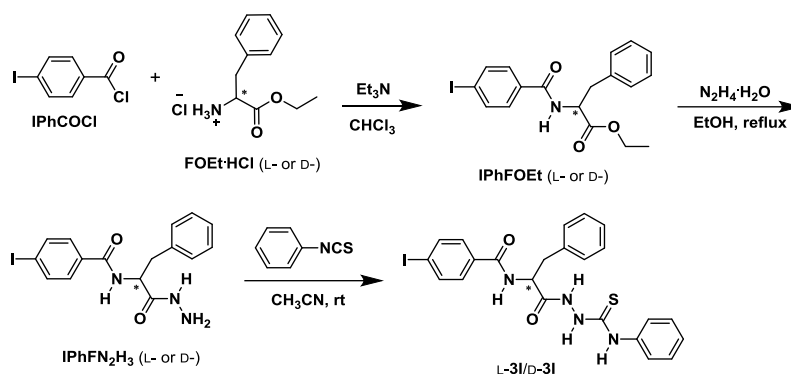

**Scheme S3.** General procedures for the syntheses of **3I**

**3I:** To a  $\text{CHCl}_3$  solution (40 mL) of ethyl phenylalaninate hydrochloride (**FOEt·HCl**, L- or D-, 2.30 g, 10.0 mmol) and  $\text{Et}_3\text{N}$  (3.0 mL), 4-iodobenzoyl chloride (**IPhCOCl**, 2.93 g, 11.0 mmol) was added, and the mixture was stirred for 12 h at room temperature. The solvent was removed by evaporated in vacuo. The solid residue was dissolved in EtOAc and then the solution was washed successively with 1%  $\text{NH}_3\cdot\text{H}_2\text{O}$ , 1% HCl and saturated NaCl solutions. The solution was then dried over anhydrous  $\text{Na}_2\text{SO}_4$  and concentrated in vacuo, generating solid product **IPhFOEt** (3.46 g, yield 82%). Excess aqueous hydrazine (85%, 6.0 mL) was added to **IPhFOEt** in EtOH (40 mL) and the mixture was refluxed for 24 hours. The solvent was removed by evaporated in vacuo, and the crude product was washed with  $\text{CH}_3\text{CN}$  several times to afford white solid product **IPhFN<sub>2</sub>H<sub>3</sub>** (2.85g, yield 85%). To a  $\text{CH}_3\text{CN}$  solution (30 mL) of **IPhFN<sub>2</sub>H<sub>3</sub>** (0.50 g, 1.22 mmol), excess phenyl isocyanate (0.5 mL) was added, and the mixture was stirred for 24 h at room temperature. After filtration, the solid was washed by  $\text{CH}_3\text{CN}$  and  $\text{Et}_2\text{O}$ , and then dried in vacuum to obtain **3I** (0.57 g, yield 86%).

**L-3I:**  $^1\text{H}$  NMR (500 MHz,  $\text{DMSO-}d_6$ ):  $\delta$  (ppm) 10.44 (s, 1H), 9.77 (s, 1H), 9.21 (s, 1H), 8.94 (s, 1H), 7.85 (d,  $J = 8.2$  Hz, 2H), 7.58 (t,  $J = 7.2$  Hz, 4H), 7.34 (dd,  $J = 13.3, 5.6$  Hz, 4H), 7.27 (t,  $J = 7.5$  Hz, 2H), 7.17 (dd,  $J = 16.1, 7.5$  Hz, 2H), 4.60 (s, 1H), 3.23 (s, 1H), 3.14 – 3.02 (m, 1H);  $^{13}\text{C}$  NMR (151 MHz,  $\text{DMSO-}d_6$ ):  $\delta$  (ppm) 180.26, 170.78, 166.84, 139.01, 137.83, 137.20, 132.97, 129.48, 129.24, 128.25, 126.44, 125.03, 124.58, 99.48, 54.62, 36.03; HRMS (ESI): calcd for  $[\text{C}_{23}\text{H}_{21}\text{IN}_4\text{NaO}_2\text{S}]^+$ : 567.0328, found: 567.0327.

**D-3I:**  $^1\text{H}$  NMR (500 MHz,  $\text{DMSO-}d_6$ ):  $\delta$  (ppm) 10.45 (s, 1H), 9.79 (s, 1H), 9.21 (s, 1H), 8.97 (s, 1H), 7.86 (d,  $J = 8.2$  Hz, 2H), 7.57 (t,  $J = 6.9$  Hz, 4H), 7.34 (dd,  $J = 15.8, 7.9$  Hz, 4H), 7.27 (t,  $J = 7.6$  Hz, 2H), 7.18 (dd,  $J = 16.8, 7.8$  Hz, 2H), 4.58 (s, 1H), 3.22 (s, 1H), 3.11 – 3.02 (m, 1H);  $^{13}\text{C}$  NMR (126 MHz,  $\text{DMSO-}d_6$ ):  $\delta$  (ppm) 180.39, 170.69, 166.69, 138.98, 137.80, 137.14, 132.97, 129.42, 129.18, 128.19, 126.38, 124.91, 124.40, 99.33, 54.47, 36.07; HRMS (ESI): calcd for  $[\text{C}_{23}\text{H}_{21}\text{IN}_4\text{NaO}_2\text{S}]^+$ : 567.0328, found: 567.0323.

## 2. Experimental data

**Table S1.** Crystallographic data for L-**II** and D-**II**

| Compound reference                                           | L- <b>II</b> <sup>a</sup>                                                    | D- <b>II</b> <sup>a</sup>                                                    |
|--------------------------------------------------------------|------------------------------------------------------------------------------|------------------------------------------------------------------------------|
| Empirical formula                                            | C <sub>17</sub> H <sub>17</sub> IN <sub>4</sub> O <sub>2</sub> S             | C <sub>17</sub> H <sub>17</sub> IN <sub>4</sub> O <sub>2</sub> S             |
| Formula weight                                               | 468.30                                                                       | 468.30                                                                       |
| Temperature/K                                                | 100.1(2)                                                                     | 99.9(7)                                                                      |
| Crystal system                                               | orthorhombic                                                                 | orthorhombic                                                                 |
| Space group                                                  | <i>P</i> 2 <sub>1</sub> 2 <sub>1</sub> 2 <sub>1</sub>                        | <i>P</i> 2 <sub>1</sub> 2 <sub>1</sub> 2 <sub>1</sub>                        |
| <i>a</i> /Å                                                  | 4.65650(10)                                                                  | 4.65680(10)                                                                  |
| <i>b</i> /Å                                                  | 16.8753(3)                                                                   | 16.8731(4)                                                                   |
| <i>c</i> /Å                                                  | 22.9925(4)                                                                   | 22.9659(6)                                                                   |
| $\alpha$ /°                                                  | 90                                                                           | 90                                                                           |
| $\beta$ /°                                                   | 90                                                                           | 90                                                                           |
| $\gamma$ /°                                                  | 90                                                                           | 90                                                                           |
| Volume/Å <sup>3</sup>                                        | 1806.75(6)                                                                   | 1804.54(7)                                                                   |
| Z                                                            | 4                                                                            | 4                                                                            |
| $\rho_{\text{calc}}$ /cm <sup>3</sup>                        | 1.722                                                                        | 1.724                                                                        |
| $\mu$ /mm <sup>-1</sup>                                      | 15.167                                                                       | 15.186                                                                       |
| F(000)                                                       | 928.0                                                                        | 928.0                                                                        |
| Crystal size/mm <sup>3</sup>                                 | 0.42 × 0.26 × 0.22                                                           | 0.26 × 0.24 × 0.16                                                           |
| Radiation                                                    | CuK $\alpha$ ( $\lambda$ = 1.54184)                                          | CuK $\alpha$ ( $\lambda$ = 1.54184)                                          |
| 2 $\Theta$ range for data collection/°                       | 6.498 to 121.986                                                             | 6.5 to 153.93                                                                |
| Index ranges                                                 | -5 ≤ <i>h</i> ≤ 3, -19 ≤ <i>k</i> ≤ 19, -25 ≤ <i>l</i> ≤ 26                  | -5 ≤ <i>h</i> ≤ 5, -19 ≤ <i>k</i> ≤ 21, -26 ≤ <i>l</i> ≤ 27                  |
| Reflections collected                                        | 5001                                                                         | 6214                                                                         |
| Independent reflections                                      | 2638 [ <i>R</i> <sub>int</sub> = 0.0522, <i>R</i> <sub>sigma</sub> = 0.0627] | 3149 [ <i>R</i> <sub>int</sub> = 0.0528, <i>R</i> <sub>sigma</sub> = 0.0616] |
| Data/restraints/parameters                                   | 2638/150/227                                                                 | 3149/0/227                                                                   |
| Goodness-of-fit on F <sup>2</sup>                            | 1.156                                                                        | 1.145                                                                        |
| Final <i>R</i> indexes [ <i>I</i> ≥ 2 $\sigma$ ( <i>I</i> )] | <i>R</i> <sub>1</sub> = 0.0585, <i>wR</i> <sub>2</sub> = 0.1556              | <i>R</i> <sub>1</sub> = 0.0377, <i>wR</i> <sub>2</sub> = 0.0930              |
| Final <i>R</i> indexes [all data]                            | <i>R</i> <sub>1</sub> = 0.0615, <i>wR</i> <sub>2</sub> = 0.1741              | <i>R</i> <sub>1</sub> = 0.0449, <i>wR</i> <sub>2</sub> = 0.1190              |
| Largest diff. peak/hole / e Å <sup>-3</sup>                  | 1.36/-1.41                                                                   | 1.67/-1.11                                                                   |
| Flack parameter                                              | -0.007(11)                                                                   | -0.013(7)                                                                    |
| CCDC number                                                  | 1998162                                                                      | 1998163                                                                      |

<sup>a</sup> Grown in *i*PrOH solution via slow evaporation.

**Table S2.** Torsions, types of  $\beta$ -turns and geometrical parameters and calculated interaction energies of intramolecular ten-membered ring hydrogen bonds revealed by the X-ray crystal structures

| Crystal structure                                   | L- <b>1I</b> | D- <b>1I</b> | L- <b>1H</b> | D- <b>1H</b> | <i>rac</i> - <b>1H</b> @L- <b>1H</b> | <i>rac</i> - <b>1H</b> @D- <b>1H</b> |
|-----------------------------------------------------|--------------|--------------|--------------|--------------|--------------------------------------|--------------------------------------|
| $\varphi_{i+1}/^\circ$                              | -58.77       | 57.81        | -55.64       | 55.85        | 60.58                                | 60.58                                |
| $\psi_{i+1}/^\circ$                                 | 135.97       | -136.46      | 141.58       | -141.66      | 134.91                               | -134.91                              |
| $\varphi_{i+2}/^\circ$                              | 70.72        | -69.07       | 67.56        | -67.90       | 76.33                                | -76.33                               |
| $\psi_{i+2}/^\circ$                                 | 8.37         | -9.99        | 14.98        | -14.86       | 2.08                                 | -2.08                                |
| Type <sup>S2</sup>                                  | II           | II'          | II           | II'          | II                                   | II'                                  |
| Length <sup>a</sup> / Å                             | 2.117        | 2.147        | 2.392        | 2.387        | 2.109                                | 2.109                                |
| Angle <sup>b</sup> / °                              | 149.40       | 147.96       | 137.94       | 137.89       | 148.90                               | 148.90                               |
| E <sub>nb</sub> <sup>c</sup> / kJ mol <sup>-1</sup> | -11.8        | -10.9        | -5.76        | -5.85        | -12.7                                | -11.8                                |

<sup>a</sup> Distance of H<sup>d</sup>...O<sup>e</sup>. <sup>b</sup> Angle of NH<sup>d</sup>O<sup>e</sup>. Labels of atoms are shown in Figure 2a. <sup>c</sup> Interaction energy of intramolecular N–H<sup>d</sup>...O=C hydrogen bond analyzed by Quantum Theory of Atoms In Molecules (QTAIM). Method: B3LYP DFT with the 6-311G\*\* basis set for C, H, O, N, S, and LANL2DZ for I atoms, POP=NBO.

**Table S3.** Geometrical parameters and calculated interaction energies of intermolecular interactions revealed by the X-ray crystal structures

| Crystal                | Interaction                           | Length / Å         | Angle / °                                     | $\Delta E$ <sup>c</sup> / kJ mol <sup>-1</sup> |
|------------------------|---------------------------------------|--------------------|-----------------------------------------------|------------------------------------------------|
| L- <b>1I</b>           | N–H <sup>b</sup> ...fO=C              | 2.034              | 157.77 ( $\angle$ NHO) 150.49 ( $\angle$ HOC) | -107.5                                         |
|                        | C–I... $\pi$                          | 3.896 <sup>a</sup> | 163.67 <sup>b</sup>                           | -31.59                                         |
| L- <b>1H</b>           | N–H <sup>a</sup> ...S=C               | 2.623              | 163.65 ( $\angle$ NHS) 124.08 ( $\angle$ HSC) | -63.30                                         |
|                        | N–H <sup>b</sup> ...fO=C              | 2.113              | 152.71 ( $\angle$ NHO) 151.27 ( $\angle$ HOC) | -103.59                                        |
| <i>rac</i> - <b>1H</b> | N–H <sup>a</sup> ...S=C               | 2.669              | 153.67 ( $\angle$ NHS) 118.10 ( $\angle$ HSC) | -53.24                                         |
|                        | N–H <sup>a</sup> ...fO=C              | 2.264              | 150.67 ( $\angle$ NHO) 157.93 ( $\angle$ HOC) | -60.91                                         |
|                        | N–H <sup>c</sup> ...S=C               | 2.471              | 167.44 ( $\angle$ NHS) 112.02 ( $\angle$ HSC) | -50.48 <sup>d</sup>                            |
|                        | N–H <sup>b</sup> ...iO–H <sup>h</sup> | 1.977              | 175.67 ( $\angle$ NHO) 109.57 ( $\angle$ HOC) | -26.05                                         |
|                        | iO–H <sup>h</sup> ...S=C              | 2.468              | 145.91 ( $\angle$ OHS) 126.97 ( $\angle$ HSC) | -18.84                                         |

<sup>a</sup> Distance of iodine to the centroid of benzene ring. <sup>b</sup> Angle of C, I and the centroid of benzene ring. <sup>c</sup> Method: WB97XD DFT with the 6-31+G(d,p) basis set for C, H, O, N, S, and LANL2DZ for I atoms. <sup>d</sup> Interaction energy of double N–H<sup>c</sup>...S=C hydrogen bonds.

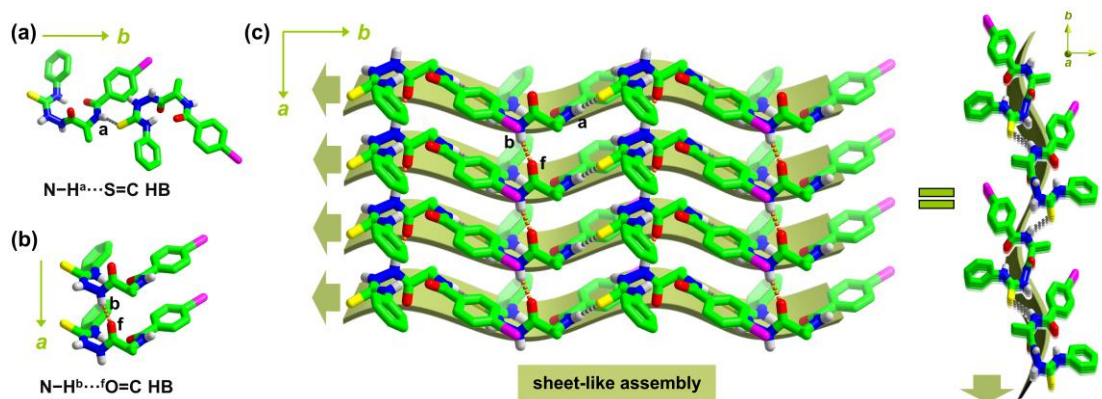

**Figure S1.** (a) Intermolecular N-H<sup>a</sup>...S=C hydrogen bond (HB, dashed gray line) along *b*-axis of L-**1I** crystal. (b) Intermolecular N-H<sup>b</sup>...fO=C hydrogen bond (HB, dashed orange line) along *a*-axis of L-**1I** crystal. (c) Sheet-like 2D assembly from L-**1I** within *ab* plane, supported by N-H<sup>a</sup>...S=C hydrogen bonds (dashed gray lines) along *b*-axis and N-H<sup>b</sup>...fO=C hydrogen bonds (dashed orange lines) along *a*-axis. For clarity, -CH protons are omitted. The thick arrows indicate the direction of *N*- to *C*-terminus of L-**1I** along the strand structure.

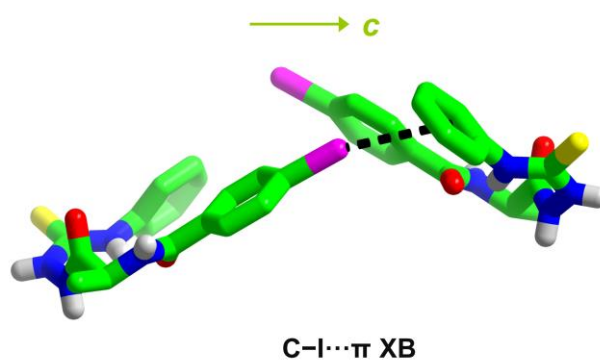

**Figure S2.** Intermolecular C-I...π halogen bond (XB, dashed black line) along *c*-axis of L-**1I** crystal. For clarity, -CH protons are omitted.

**Table S4.** Natural bond orbital (NBO) analysis<sup>a</sup> for intermolecular C–I··· $\pi$  interaction in L-**11** dimer

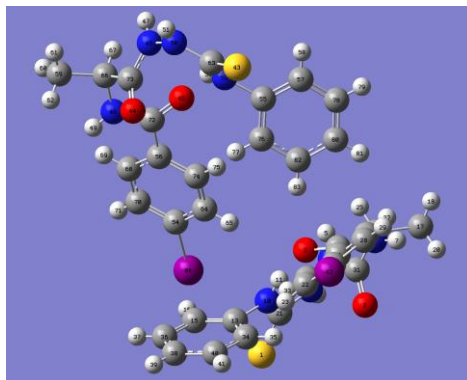

| Interaction  | Donor                                    | Acceptor                             | $E^{(2)}$ (kJ mol <sup>-1</sup> ) <sup>b</sup> |
|--------------|------------------------------------------|--------------------------------------|------------------------------------------------|
| C–I··· $\pi$ | BD(2)(C <sup>36</sup> –C <sup>38</sup> ) |                                      | 1.13                                           |
|              | BD(1)(C <sup>38</sup> –C <sup>40</sup> ) | $\sigma^*(I^{84}$ –C <sup>54</sup> ) | 0.25                                           |
|              | LP(1)(C <sup>40</sup> )                  |                                      | 9.24                                           |

<sup>a</sup> Method: WB97XD DFT with the 6-31+G(d,p) basis set for C, H, O, N, S, and LANL2DZ for I atoms. POP = NBO. <sup>b</sup> The second-order perturbation energy.

**Table S5.** Topological parameters ( $\rho$  and  $\nabla^2\rho$ ) of the intermolecular critical point 29 in L-**11** dimer for C–I··· $\pi$  halogen bond and the calculated interaction energy ( $E_{nb}$ ) analyzed by Quantum Theory of Atoms In Molecules (QTAIM)

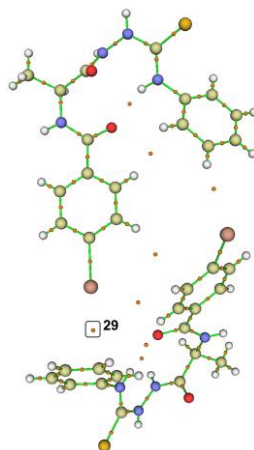

| Critical point | Contact      | $\rho$ | $\nabla^2\rho$ | $E_{nb}$ (kJ mol <sup>-1</sup> ) |
|----------------|--------------|--------|----------------|----------------------------------|
| 29             | C–I··· $\pi$ | 0.008  | 0.025          | -6.76                            |



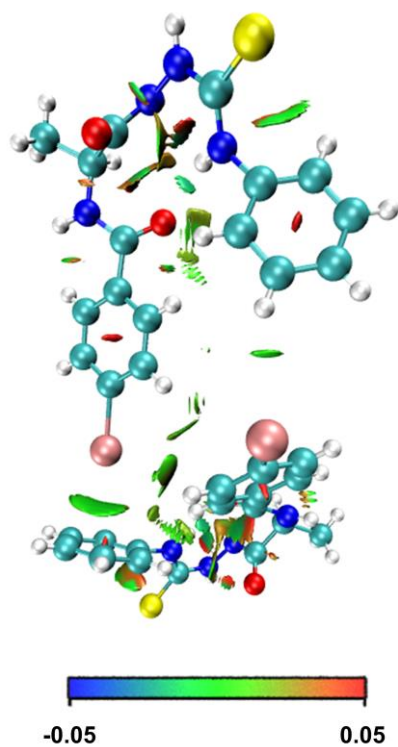

**Figure S3.** Noncovalent interaction (NCI) surfaces (-0.05 to 0.05 a.u.) for representative C–I $\cdots$  $\pi$  halogen bond in *L*-**II** dimer. Color code: red for repulsive, yellow for weakly repulsive, green for weakly attractive, and blue for strongly attractive forces.

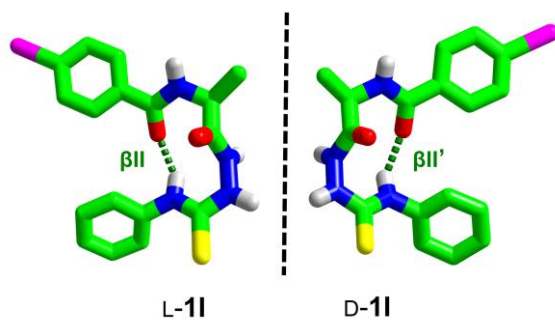

**Figure S4.** Crystal structures of *L*-**II** and *D*-**II**, showing  $\beta$ II and  $\beta$ II'-turns, respectively. For clarity, –CH protons are omitted.

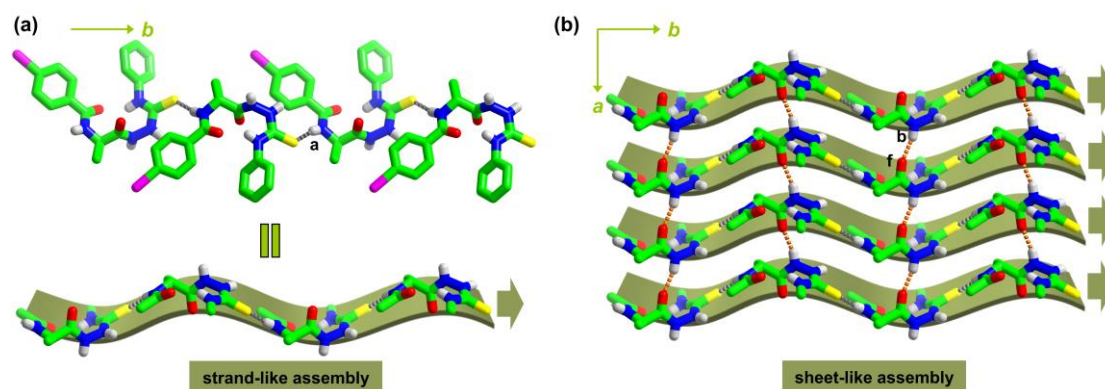

**Figure S5.** (a) Strand-like 1D assembly from **D-II** molecules along *b*-axis via intermolecular N-H<sup>a</sup>...S=C hydrogen bonds (dashed gray lines). (b) N-H<sup>b</sup>...<sup>f</sup>O=C hydrogen bonds (dashed orange lines) along *a*-axis link parallel strand-like 1D assemblies into a sheet-like 2D assembly within *ab* plane. For clarity, -CH protons are omitted, in the strand and sheet-like assemblies, iodophenyl and phenyl rings are also omitted. The thick arrows indicate the direction of *N*- to *C*-terminus of **D-II** along the strand structure.

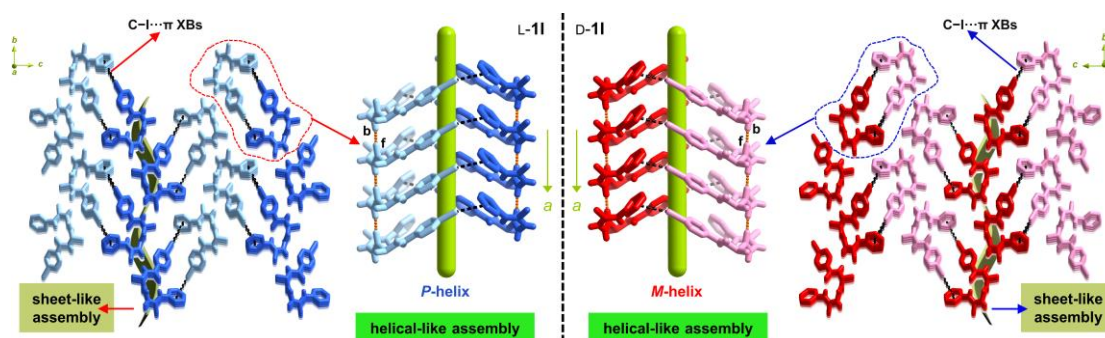

**Figure S6.** Mirror symmetric 3D superstructures from **L-II** (left) and **D-II** (right), consisting of helical and sheet-like assemblies. While *P*-helix is formed in **L-II** crystal, *M*-helix is formed in **D-II** crystal, both supported by C-I...π halogen bonds and N-H<sup>b</sup>...<sup>f</sup>O=C hydrogen bonds. For clarity, -CH protons are omitted.

**Table S6.** Crystallographic data for five selected single crystals of *rac*-**11** grown in *i*PrOH

| No.             | 1                                                     | 2                                                     | 3                                                     | 4                                                     | 5                                                     |
|-----------------|-------------------------------------------------------|-------------------------------------------------------|-------------------------------------------------------|-------------------------------------------------------|-------------------------------------------------------|
| Space group     | <i>P</i> 2 <sub>1</sub> 2 <sub>1</sub> 2 <sub>1</sub> |
| <i>a</i> /Å     | 4.65582(4)                                            | 4.65460(10)                                           | 4.65380(10)                                           | 4.65500(10)                                           | 4.65480(10)                                           |
| <i>b</i> /Å     | 16.87090(15)                                          | 16.8691(2)                                            | 16.8730(2)                                            | 16.8779(2)                                            | 22.9809(6)                                            |
| <i>c</i> /Å     | 22.9733(2)                                            | 22.9657(3)                                            | 22.9596(3)                                            | 22.9656(2)                                            | 16.8815(4)                                            |
| $\alpha$ /°     | 90                                                    | 90                                                    | 90                                                    | 90                                                    | 90                                                    |
| $\beta$ /°      | 90                                                    | 90                                                    | 90                                                    | 90                                                    | 90                                                    |
| $\gamma$ /°     | 90                                                    | 90                                                    | 90                                                    | 90                                                    | 90                                                    |
| Flack parameter | -0.007(5)                                             | 0.022(4)                                              | -0.019(6)                                             | -0.009(13)                                            | 0.072(6)                                              |
| Structure       | D- <b>11</b>                                          | D- <b>11</b>                                          | L- <b>11</b>                                          | D- <b>11</b>                                          | L- <b>11</b>                                          |

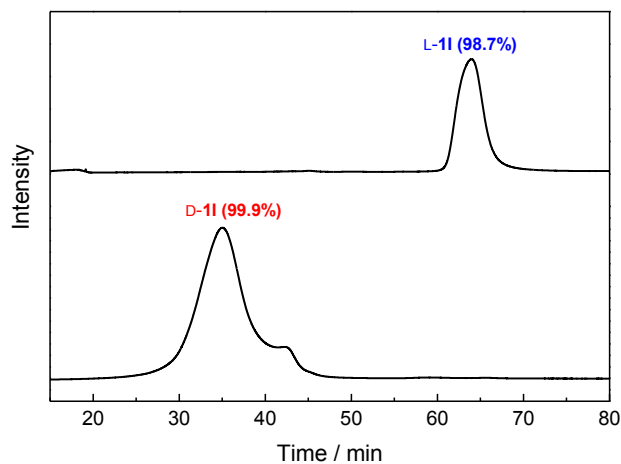**Figure S7.** HPLC traces of selected single *rac*-**11** crystals grown in *i*PrOH. Column: Chiralpak@ID (250 × 4.6 mm). Mobile phase: *n*-hexane/2-propanol = 47:53 (v/v). Flow rate: 1.0 mL/min. Wavelength: UV 270 nm.

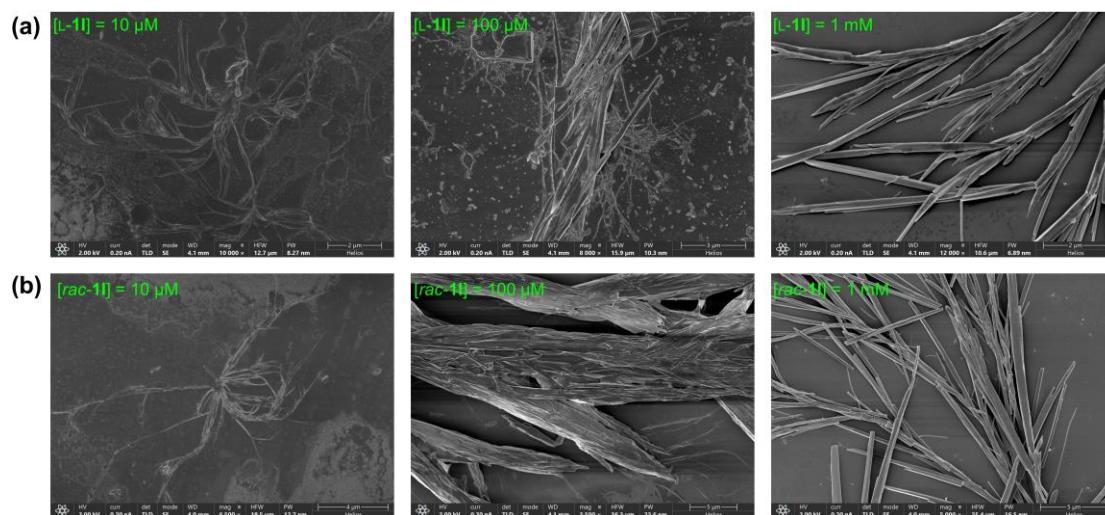

**Figure S8.** Concentration-dependent SEM images of air-dried samples on platinum-coated silicon wafers of **L-1I** (a) and **rac-1I** (b) in *i*PrOH.

**Table S7.** Crystallographic data for L-**1H**, D-**1H** and *rac*-**1H**

| Compound reference                          | L- <b>1H</b> <sup>a</sup>                                       | D- <b>1H</b> <sup>a</sup>                                       | <i>rac</i> - <b>1H</b> <sup>b</sup>                                                |
|---------------------------------------------|-----------------------------------------------------------------|-----------------------------------------------------------------|------------------------------------------------------------------------------------|
| Empirical formula                           | C <sub>17</sub> H <sub>18</sub> N <sub>4</sub> O <sub>2</sub> S | C <sub>17</sub> H <sub>18</sub> N <sub>4</sub> O <sub>2</sub> S | C <sub>17</sub> H <sub>18</sub> N <sub>4</sub> O <sub>2</sub> S, CH <sub>4</sub> O |
| Formula weight                              | 342.41                                                          | 342.41                                                          | 374.45                                                                             |
| Temperature/K                               | 100.01(10)                                                      | 99.9(7)                                                         | 100.00(10)                                                                         |
| Crystal system                              | orthorhombic                                                    | orthorhombic                                                    | monoclinic                                                                         |
| Space group                                 | P2 <sub>1</sub> 2 <sub>1</sub> 2 <sub>1</sub>                   | P2 <sub>1</sub> 2 <sub>1</sub> 2 <sub>1</sub>                   | P2 <sub>1</sub> /n                                                                 |
| a/Å                                         | 4.7117(2)                                                       | 4.70400(10)                                                     | 11.7516(2)                                                                         |
| b/Å                                         | 15.8669(8)                                                      | 15.8512(3)                                                      | 8.56240(10)                                                                        |
| c/Å                                         | 22.3016(12)                                                     | 22.2569(4)                                                      | 18.9290(3)                                                                         |
| α/°                                         | 90                                                              | 90                                                              | 90                                                                                 |
| β/°                                         | 90                                                              | 90                                                              | 91.2740(10)                                                                        |
| γ/°                                         | 90                                                              | 90                                                              | 90                                                                                 |
| Volume/Å <sup>3</sup>                       | 1667.27(14)                                                     | 1659.56(6)                                                      | 1904.20(5)                                                                         |
| Z                                           | 4                                                               | 4                                                               | 4                                                                                  |
| ρ <sub>calc</sub> /cm <sup>3</sup>          | 1.364                                                           | 1.370                                                           | 1.306                                                                              |
| μ/mm <sup>-1</sup>                          | 0.212                                                           | 1.882                                                           | 1.724                                                                              |
| F(000)                                      | 720.0                                                           | 720.0                                                           | 792.0                                                                              |
| Crystal size/mm <sup>3</sup>                | 0.22 × 0.11 × 0.11                                              | 0.28 × 0.22 × 0.18                                              | 0.20 × 0.16 × 0.12                                                                 |
| Radiation                                   | MoKα (λ = 0.71073)                                              | CuKα (λ = 1.54184)                                              | CuKα (λ = 1.54178)                                                                 |
| 2θ range for data collection/°              | 7.308 to 50                                                     | 6.846 to 153.794                                                | 8.77 to 148.608                                                                    |
| Index ranges                                | -5 ≤ h ≤ 4, -13 ≤ k ≤ 18, -17 ≤ l ≤ 26                          | -4 ≤ h ≤ 5, -20 ≤ k ≤ 16, -25 ≤ l ≤ 26                          | -14 ≤ h ≤ 13, -10 ≤ k ≤ 8, -21 ≤ l ≤ 23                                            |
| Reflections collected                       | 4598                                                            | 6078                                                            | 11530                                                                              |
| Independent reflections                     | 2876 [R <sub>int</sub> = 0.0223, R <sub>sigma</sub> = 0.0415]   | 3069 [R <sub>int</sub> = 0.0476, R <sub>sigma</sub> = 0.0559]   | 3748 [R <sub>int</sub> = 0.0346, R <sub>sigma</sub> = 0.0335]                      |
| Data/restraints/parameters                  | 2876/0/217                                                      | 3069/0/218                                                      | 3748/0/238                                                                         |
| Goodness-of-fit on F <sup>2</sup>           | 1.065                                                           | 1.133                                                           | 1.057                                                                              |
| Final R indexes [I ≥ 2σ (I)]                | R <sub>1</sub> = 0.0329, wR <sub>2</sub> = 0.0727               | R <sub>1</sub> = 0.0462, wR <sub>2</sub> = 0.1142               | R <sub>1</sub> = 0.0381, wR <sub>2</sub> = 0.1019                                  |
| Final R indexes [all data]                  | R <sub>1</sub> = 0.0377, wR <sub>2</sub> = 0.0759               | R <sub>1</sub> = 0.0536, wR <sub>2</sub> = 0.1388               | R <sub>1</sub> = 0.0407, wR <sub>2</sub> = 0.1046                                  |
| Largest diff. peak/hole / e Å <sup>-3</sup> | 0.31/-0.30                                                      | 0.71/-0.38                                                      | 0.29/-0.39                                                                         |
| Flack parameter                             | 0.08(5)                                                         | 0.025(16)                                                       | /                                                                                  |
| CCDC number                                 | 1998159                                                         | 1998160                                                         | 2068984                                                                            |

<sup>a</sup> Grown in *i*PrOH solution via slow evaporation. <sup>b</sup> Grown in CH<sub>3</sub>OH solution via slow evaporation.

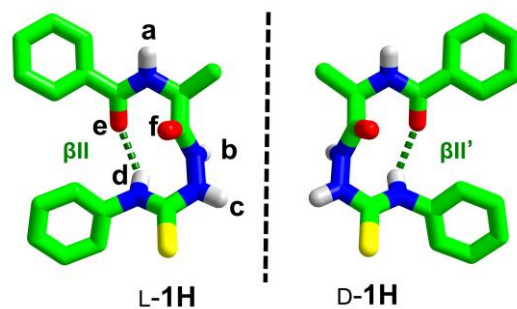

**Figure S9.** Crystal structures of **L-1H** and **D-1H**, showing  $\beta_{II}$  and  $\beta_{II}'$ -turns, respectively. For clarity,  $-\text{CH}$  protons are omitted.

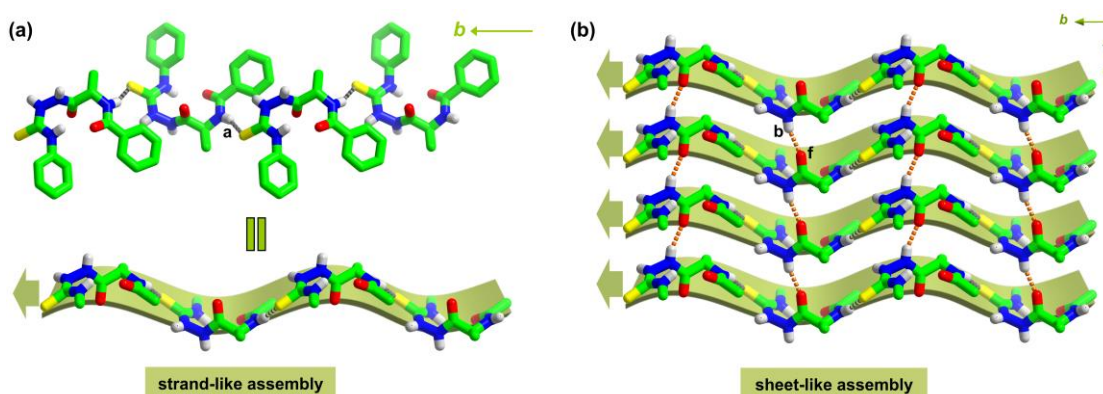

**Figure S10.** (a) Strand-like 1D assembly from **L-1H** molecules along  $b$ -axis via intermolecular  $\text{N}-\text{H}^a \cdots \text{S}=\text{C}$  hydrogen bonds (dashed gray lines). (b)  $\text{N}-\text{H}^b \cdots \text{O}=\text{C}$  hydrogen bonds (dashed orange lines) along  $a$ -axis link parallel strand-like 1D assemblies into a sheet-like 2D assembly within  $ab$  plane. For clarity,  $-\text{CH}$  protons are omitted, in the strand and sheet-like assemblies, phenyl rings are also omitted. The thick arrows indicate the direction of  $N$ - to  $C$ -terminus of **L-1H** along the strand structure.

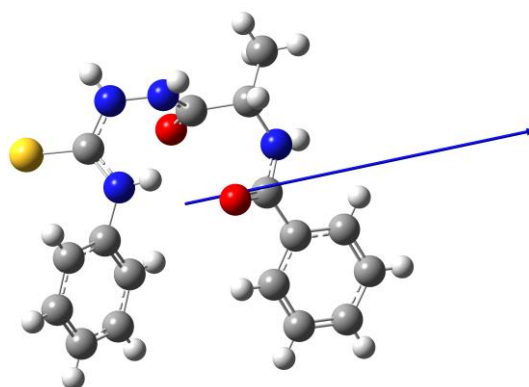

**Figure S11.** Calculated dipole moment (9.33 D) of **L-1H**, indicating that **L-1H** is polar, which can afford dipole-dipole interactions to the overall van der Waals interactions exhibited in **L-1H** crystal. Method: B3LYP DFT with the 6-311G\*\* basis set.

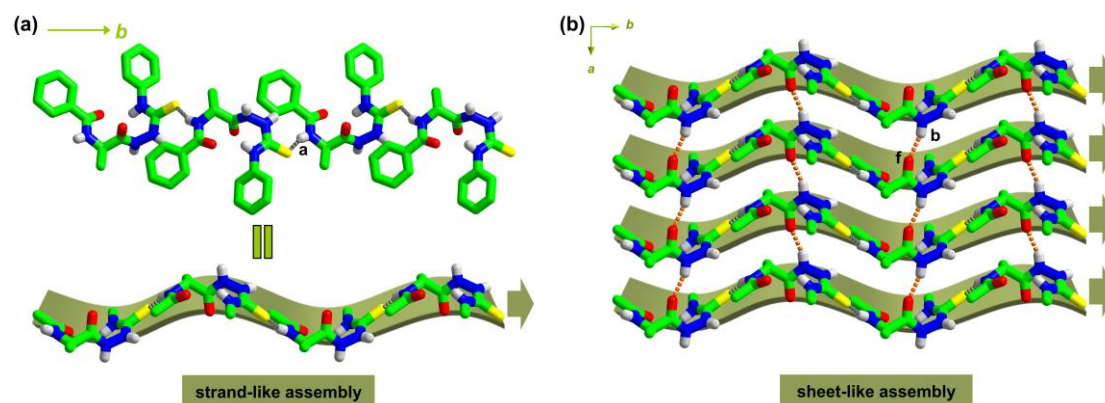

**Figure S12.** (a) Strand-like 1D assembly from **D-1H** molecules along  $b$ -axis via intermolecular  $N-H^a \cdots S=C$  hydrogen bonds (dashed gray lines). (b)  $N-H^b \cdots {}^fO=C$  hydrogen bonds (dashed orange lines) along the  $a$ -axis link parallel strand-like 1D assemblies into a sheet-like 2D assembly within  $ab$  plane. For clarity,  $-CH$  protons are omitted, in the strand and sheet-like assemblies, phenyl rings are also omitted. The thick arrows indicate the direction of  $N$ - to  $C$ -terminus of **D-1H** along the strand structure.

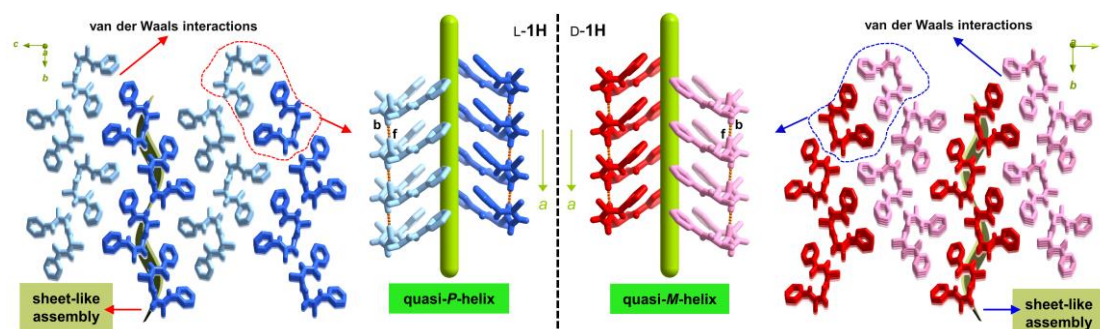

**Figure S13.** Mirror symmetric 3D superstructures from **L-1H** (left) and **D-1H** (right), consisting of quasi-helical and sheet-like assemblies. While quasi- $P$ -helix is formed in **L-1H** crystal, quasi- $M$ -helix is formed in **D-1H** crystal, both supported by  $N-H^b \cdots {}^fO=C$  hydrogen bonds and van der Waals interactions. For clarity,  $-CH$  protons are omitted.

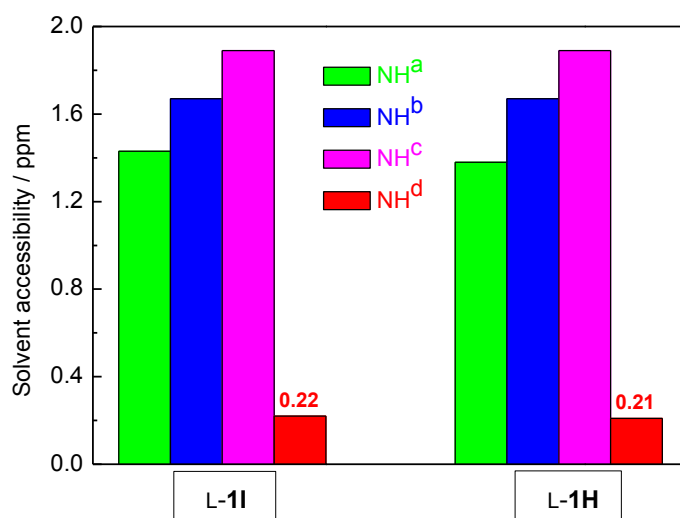

**Figure S14.** Solvent accessibility of –NH protons in L-1I and L-1H at 25 °C. Solvent accessibility is given as  $\delta_{\text{NH}}$  in DMSO- $d_6$  minus  $\delta_{\text{NH}}$  in CD<sub>3</sub>CN solutions.<sup>S3</sup> [L-1I] = [L-1H] = 4 mM. Solvent accessibilities of the thioureido –NH<sup>d</sup> protons that are involved in the intramolecular hydrogen bonding are almost the same, suggesting that the strength of  $\beta$ -turn structure in L-1I and L-1H is comparable in the solution phase.

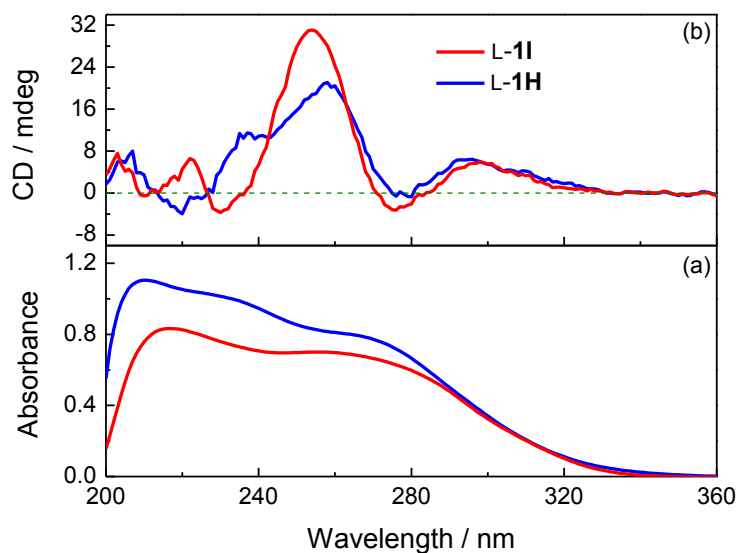

**Figure S15.** Absorption (a) and CD (b) spectra of L-1I and L-1H crystals.



**Table S8.** Crystallographic data for five single crystals of *rac*-**1H** grown in *i*PrOH

| No.             | 1                                                     | 2                                                     | 3                                                     | 4                                                     | 5                                                     |
|-----------------|-------------------------------------------------------|-------------------------------------------------------|-------------------------------------------------------|-------------------------------------------------------|-------------------------------------------------------|
| Space group     | <i>P</i> 2 <sub>1</sub> 2 <sub>1</sub> 2 <sub>1</sub> |
| <i>a</i> /Å     | 4.69890(10)                                           | 4.70300(10)                                           | 4.69510(10)                                           | 4.69330(10)                                           | 4.69942(4)                                            |
| <i>b</i> /Å     | 15.8791(4)                                            | 15.8556(2)                                            | 15.8762(3)                                            | 15.8695(4)                                            | 15.85612(15)                                          |
| <i>c</i> /Å     | 22.2710(6)                                            | 22.2560(3)                                            | 22.2731(5)                                            | 22.2403(5)                                            | 22.24912(19)                                          |
| $\alpha$ /°     | 90                                                    | 90                                                    | 90                                                    | 90                                                    | 90                                                    |
| $\beta$ /°      | 90                                                    | 90                                                    | 90                                                    | 90                                                    | 90                                                    |
| $\gamma$ /°     | 90                                                    | 90                                                    | 90                                                    | 90                                                    | 90                                                    |
| Flack parameter | -0.485(9)                                             | 0.350(7)                                              | -0.478(12)                                            | -0.440(10)                                            | -0.194(5)                                             |
| Structure       | L- <b>1H</b>                                          | L- <b>1H</b>                                          | D- <b>1H</b>                                          | L- <b>1H</b>                                          | L- <b>1H</b>                                          |

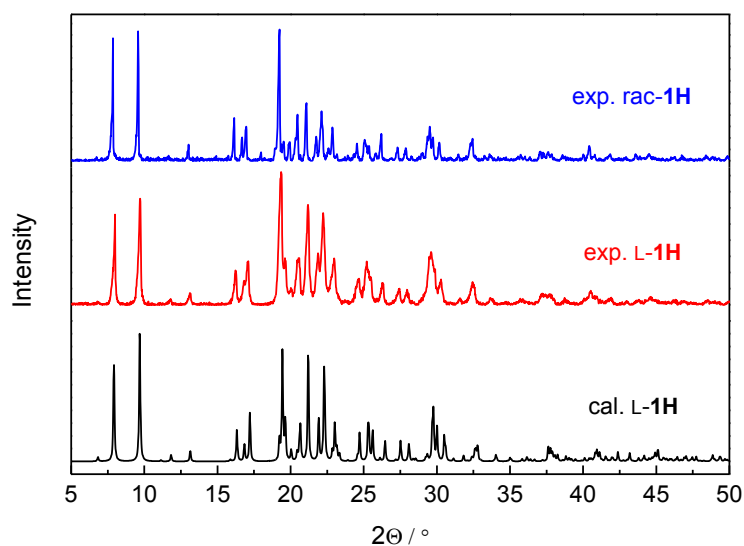**Figure S16.** Calculated and experimental XRPD patterns of L-**1H** crystals and experimental XRPD of *rac*-**1H** crystals grown in *i*PrOH. The identical XRPDs of L-**1H** and *rac*-**1H** crystals indicate that *rac*-**1H** forms racemic conglomerates in *i*PrOH.**Table S9.** Determined *ee* values for five selected single crystals of *rac*-**1H** grown in *i*PrOH<sup>a</sup>

| No.       | 1    | 2    | 3    | 4     | 5    |
|-----------|------|------|------|-------|------|
| <i>ee</i> | 9.2% | -58% | 8.6% | -4.8% | 2.0% |

<sup>a</sup> Column: Chiralpak@ID (250 × 4.6 mm). Mobile phase: *n*-hexane/2-propanol = 47:53 (v/v). Flow rate: 1.0 mL/min. Wavelength: UV 270 nm.

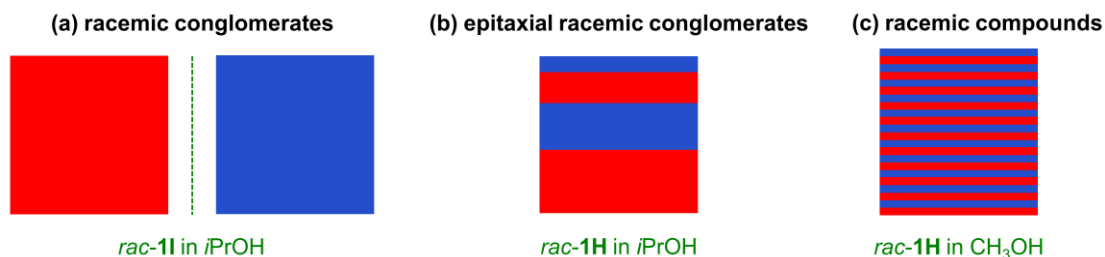

**Figure S17.** Schematic representation of racemic conglomerates formed from *rac-1I* in *i*PrOH (a), epitaxial racemic conglomerates formed from *rac-1H* in *i*PrOH (b),<sup>S4,S5</sup> and racemic compounds formed from *rac-1H* in CH<sub>3</sub>OH.

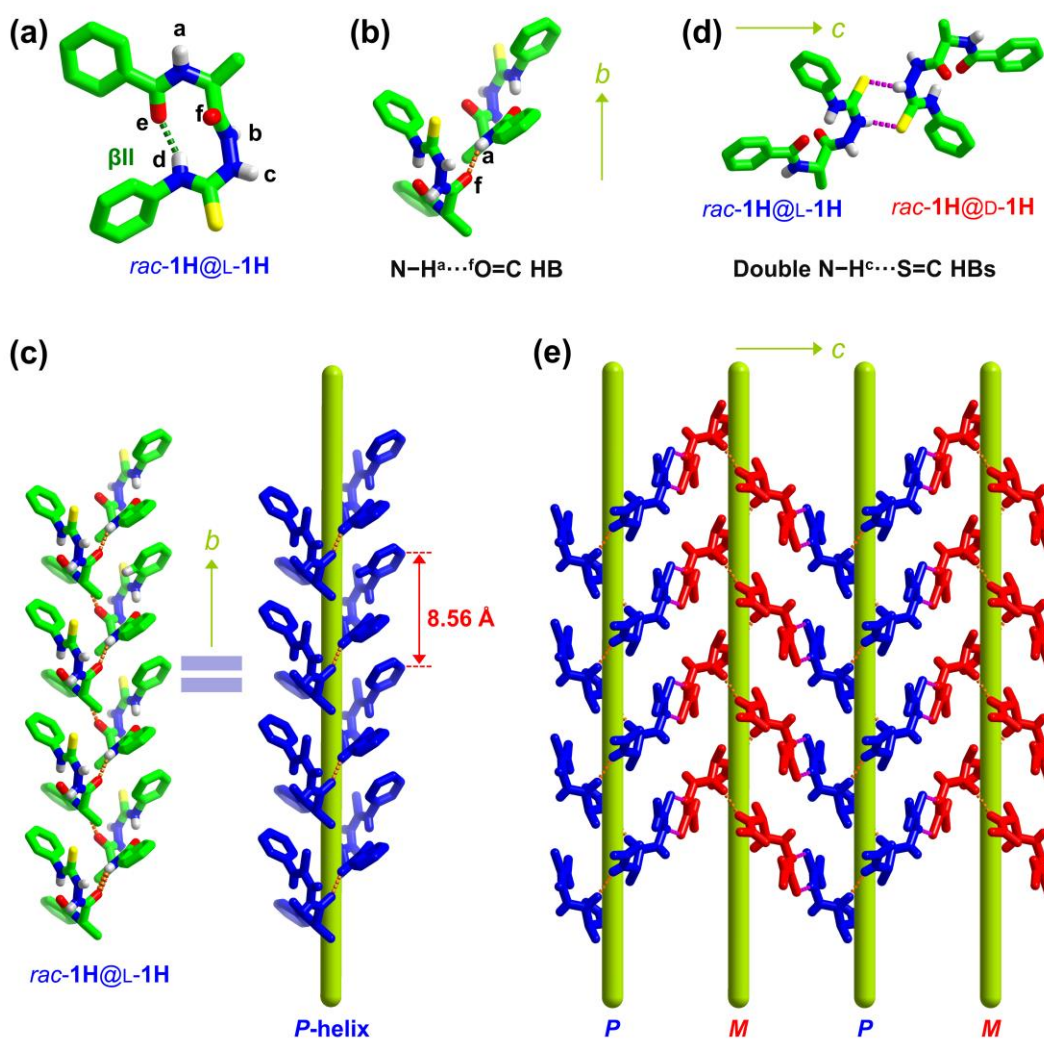

**Figure S18.** 2D Supramolecular structure in the *bc* plane of *rac-1H* crystal grown in CH<sub>3</sub>OH. (a) Crystal structure of *rac-1H@L-1H*, showing a  $\beta$ II-turn. (b) N-H<sup>a</sup>...<sup>f</sup>O=C hydrogen bond (HB, dashed orange line) between adjacent *rac-1H@L-1H* molecules along the *b*-axis. (c) Supramolecular *P*-helix from *rac-1H@L-1H* molecules along the *b*-axis via N-H<sup>a</sup>...<sup>f</sup>O=C hydrogen bonds (dashed orange lines). (d) Double N-H<sup>c</sup>...S=C hydrogen bonds (dashed pink lines)

between adjacent *rac-1H@L-1H* and *rac-1H@D-1H* molecules along the *c*-axis. (e) 2D superstructure of alternative *P*- and *M*-helices linked by double N–H<sup>c</sup>⋯S=C hydrogen bonds (dashed pink lines). For clarity, all –CH protons are omitted. In (e), *rac-1H@L-1H* molecules are depicted in blue, while *rac-1H@D-1H* molecules are depicted in red, phenyl rings are omitted for clarity.

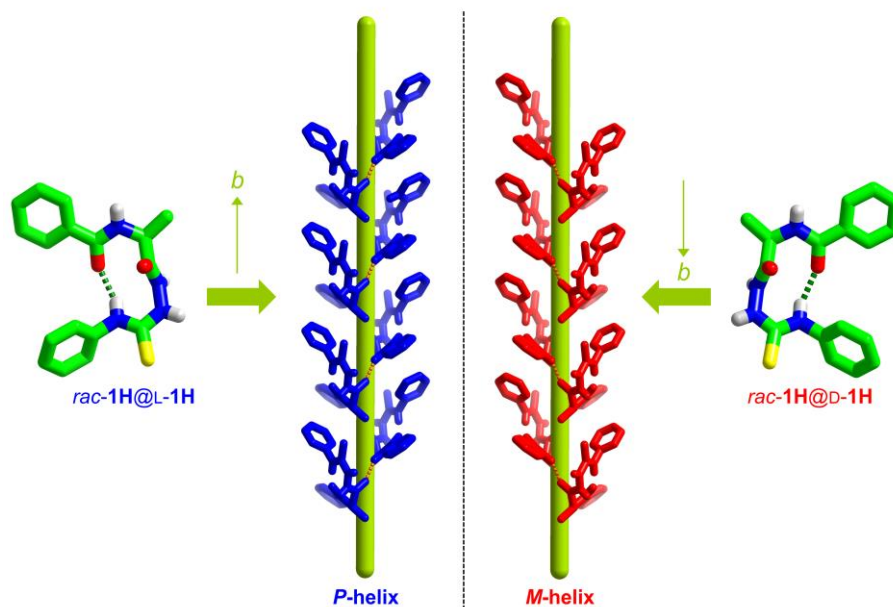

**Figure S19.** Supramolecular *P*-helix formed from *rac-1H@L-1H* (left) and *M*-helix formed from *rac-1H@D-1H* (right) along the *b*-axis in *rac-1H* crystal that grown in CH<sub>3</sub>OH. For clarity, –CH protons are omitted.

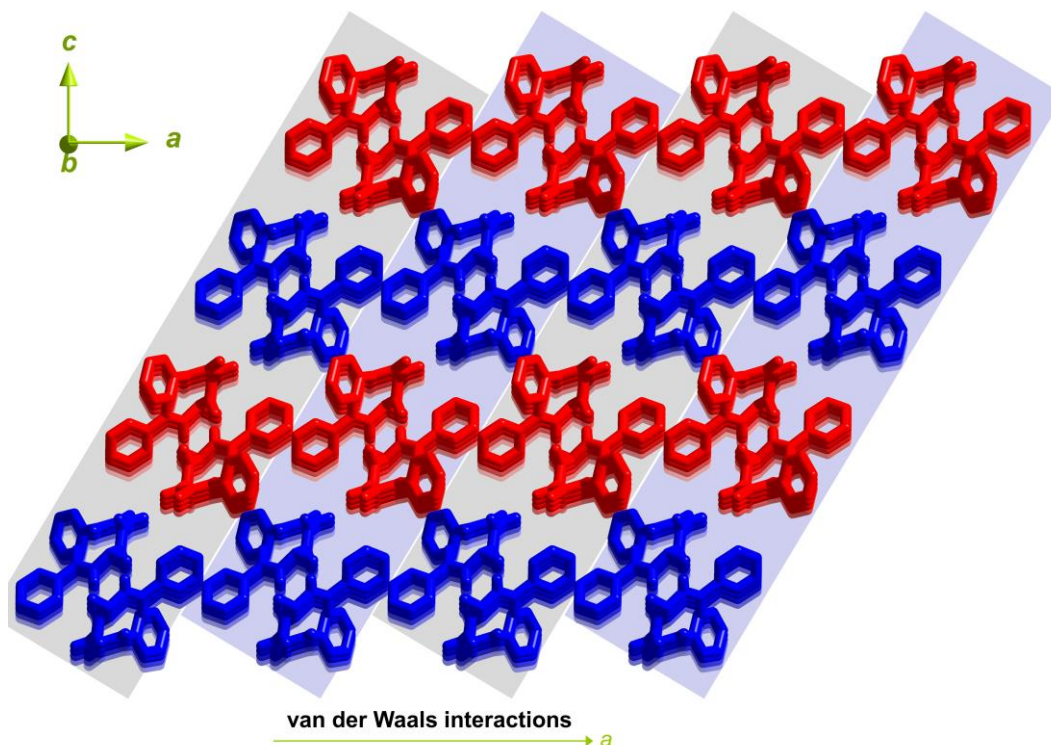

**Figure S20.** X-ray 3D superstructure of *rac-1H* crystal that grown in CH<sub>3</sub>OH. The heterochiral *bc* planes stack via van der Waals interactions in parallel manner along the *a*-axis. For clarity, -CH protons are omitted.

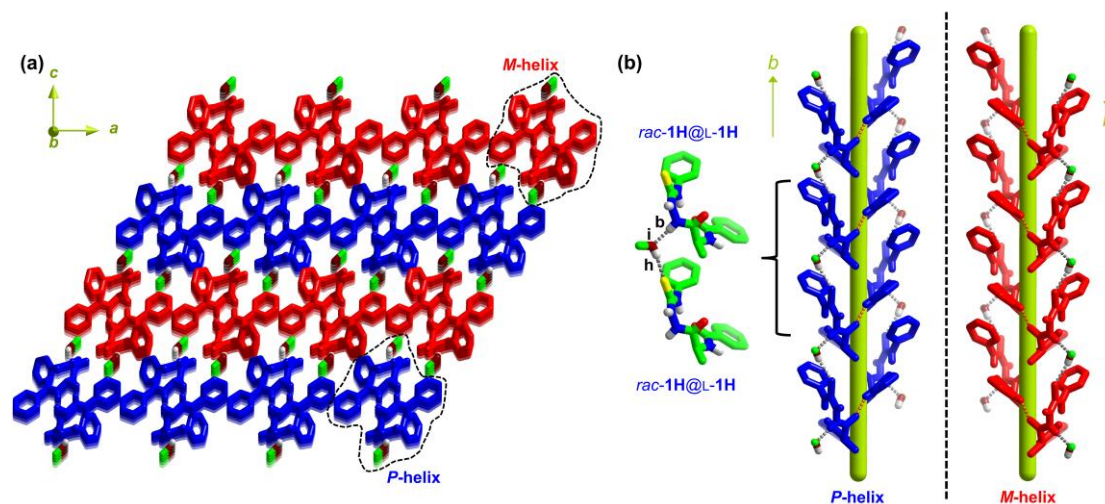

**Figure S21.** (a) Embedment of solvent CH<sub>3</sub>OH molecules in *rac-1H* crystal. (b) Along the *b*-axis, solvent CH<sub>3</sub>OH molecules afford intermolecular hydrogen bonds (<sup>i</sup>O-H<sup>h</sup>...S=C and N-H<sup>b</sup>...<sup>i</sup>O-H<sup>h</sup> hydrogen bonds) to stabilize the supramolecular *P*-helix from *rac-1H*@L-1H and *M*-helix from *rac-1H*@D-1H. For clarity, -CH protons are omitted.

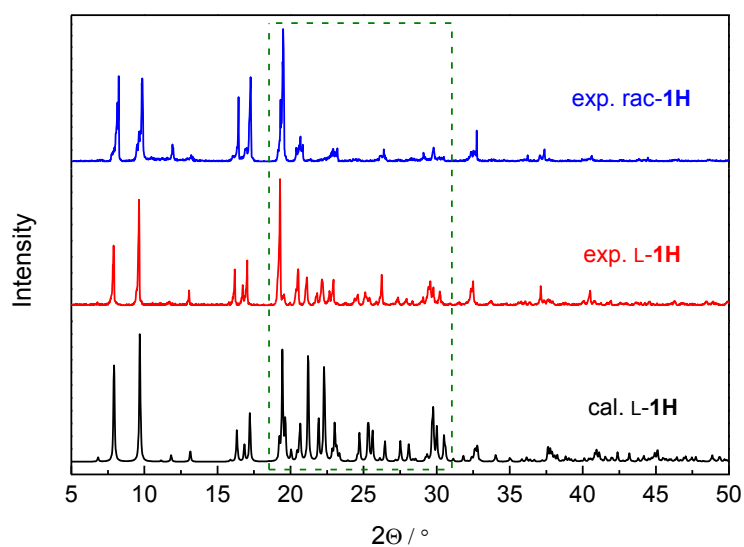

**Figure S22.** Calculated and experimental XRPD patterns of L-1H crystals and experimental XRPD of *rac*-1H crystals grown in CH<sub>3</sub>OH. The different XRPDs of L-1H and *rac*-1H crystals indicate that *rac*-1H forms racemic compounds in CH<sub>3</sub>OH.

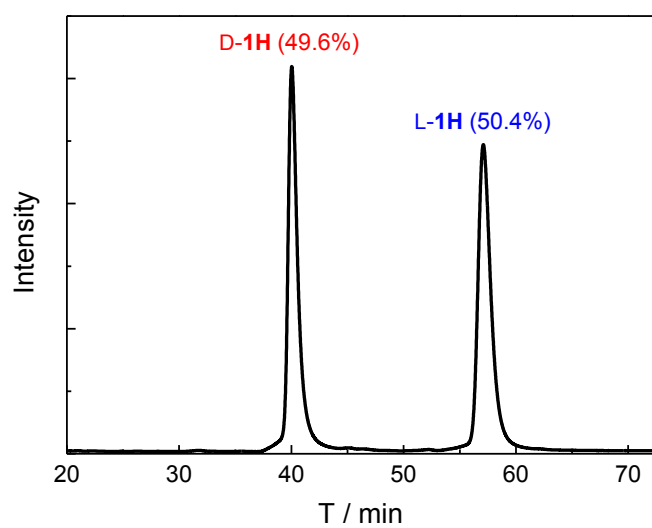

**Figure S23.** HPLC traces of one single *rac*-1H crystal grown in CH<sub>3</sub>OH. Column: Chiralpak@ID (250 × 4.6 mm). Mobile phase: *n*-hexane/2-propanol = 47:53 (v/v). Flow rate: 1.0 mL/min. Wavelength: UV 270 nm.

### 3. <sup>1</sup>H NMR and <sup>13</sup>C NMR spectra

<sup>1</sup>H NMR of L-**II** (500 MHz, DMSO-*d*<sub>6</sub>)

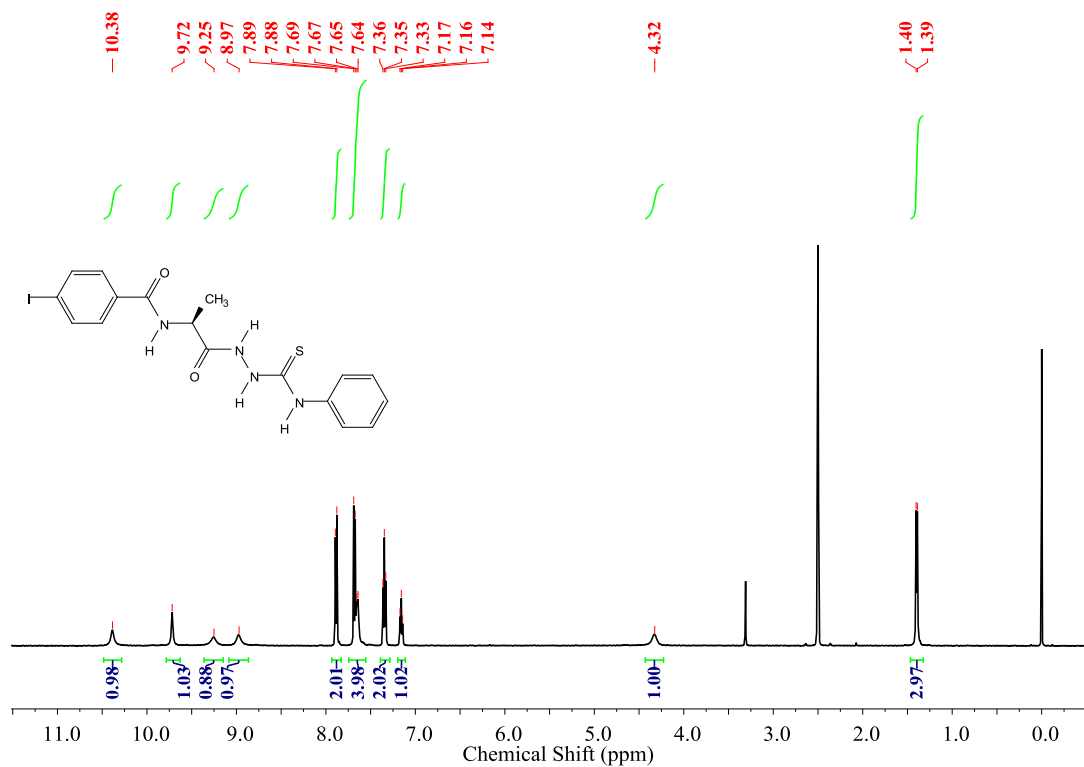

<sup>13</sup>C NMR of L-**II** (151 MHz, DMSO-*d*<sub>6</sub>)

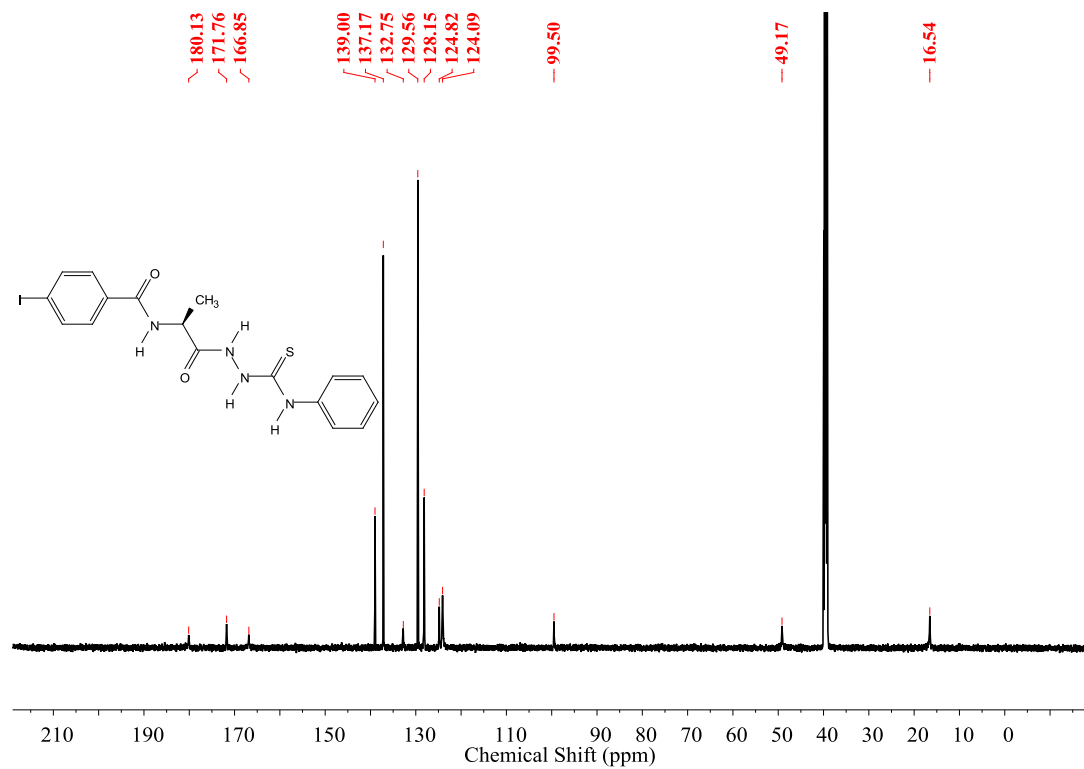

<sup>1</sup>H NMR of D-**11** (500 MHz, DMSO-*d*<sub>6</sub>)

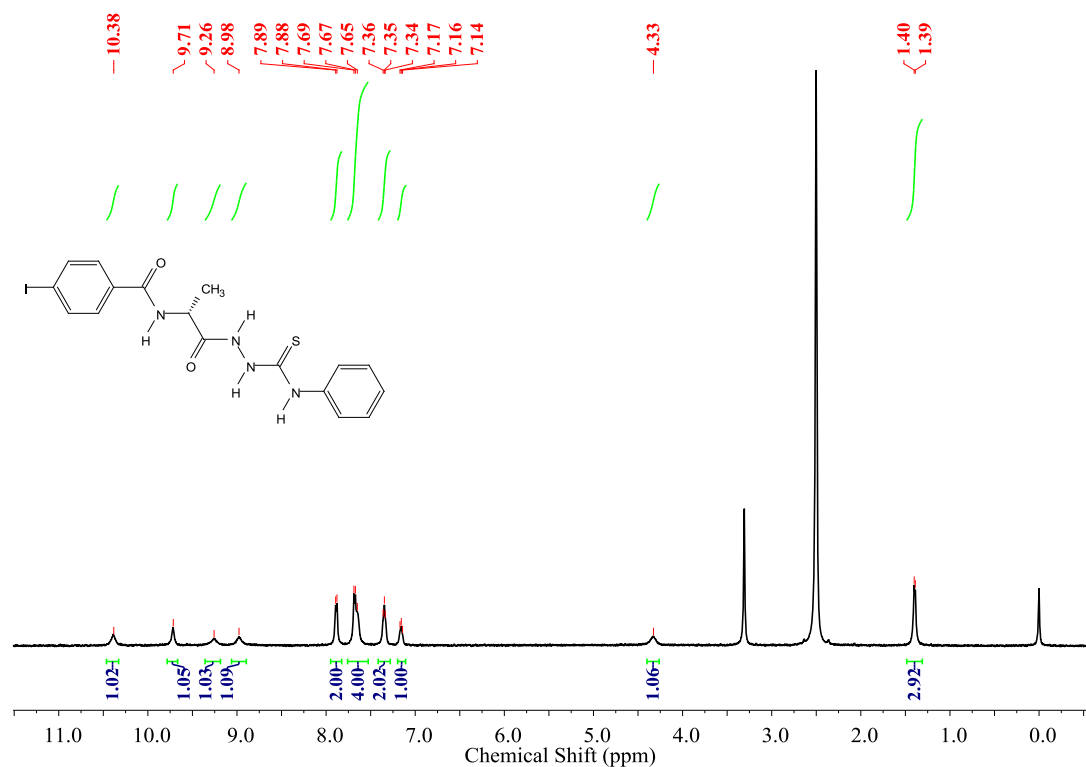

<sup>13</sup>C NMR of D-**11** (151 MHz, DMSO-*d*<sub>6</sub>)

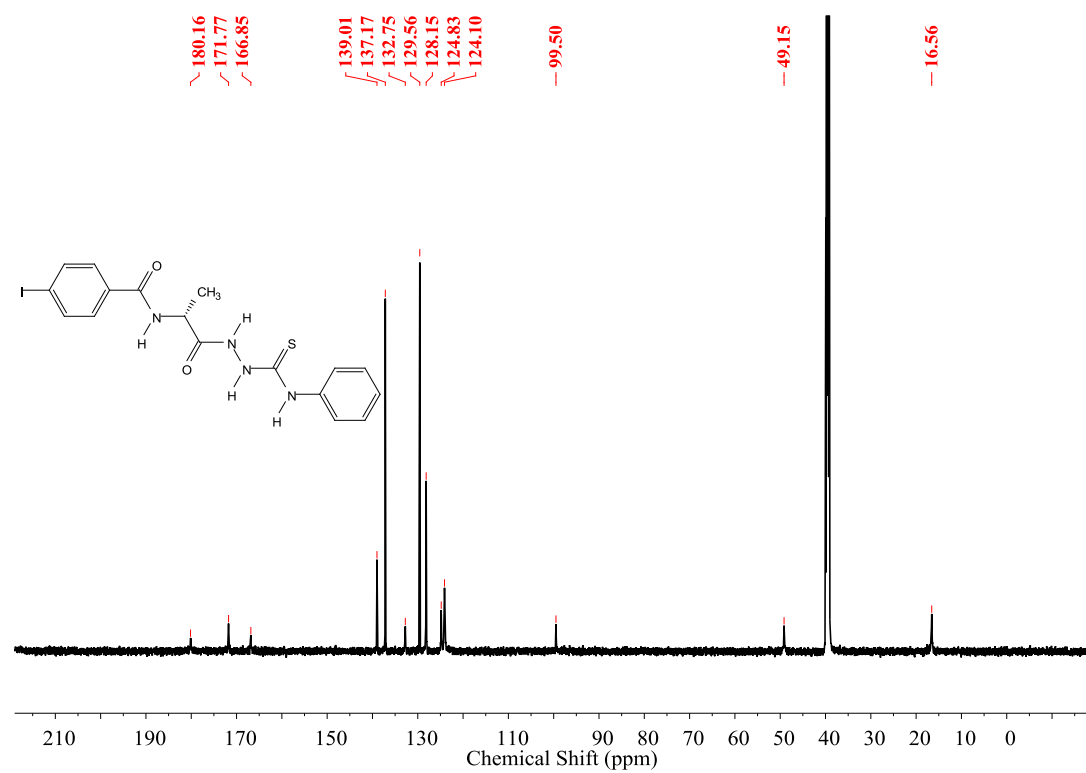

<sup>1</sup>H NMR of L-1H (500 MHz, DMSO-d<sub>6</sub>)

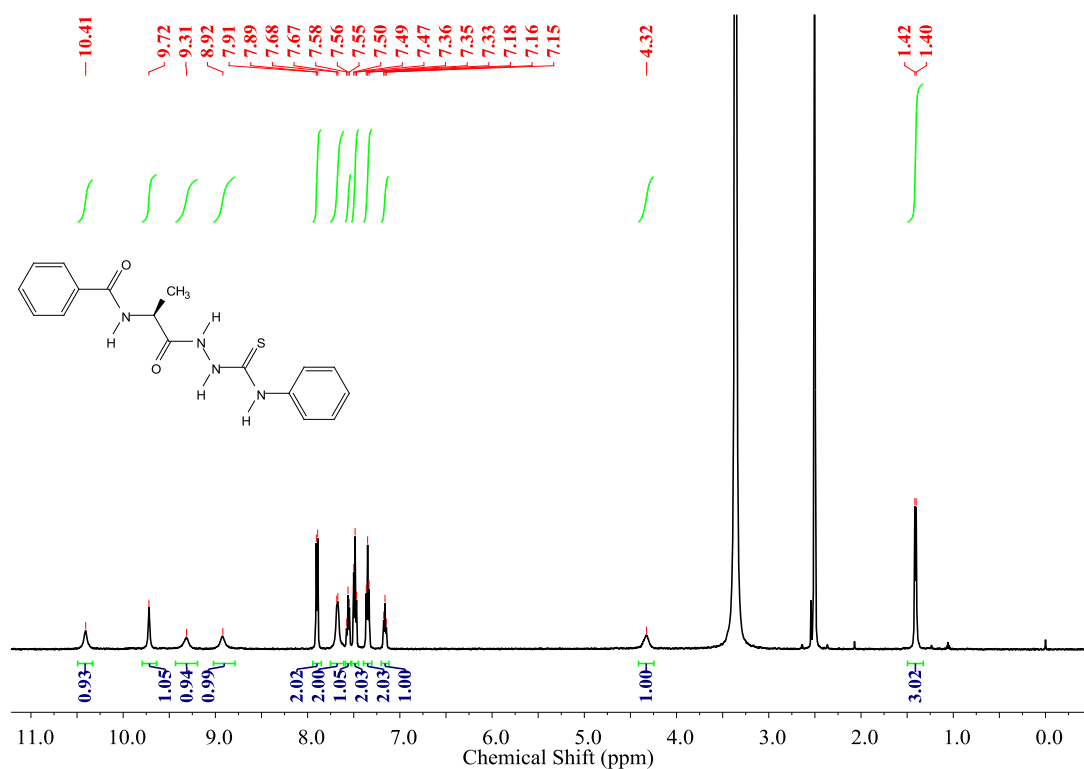

<sup>13</sup>C NMR of L-1H (214 MHz, CD<sub>3</sub>CN)

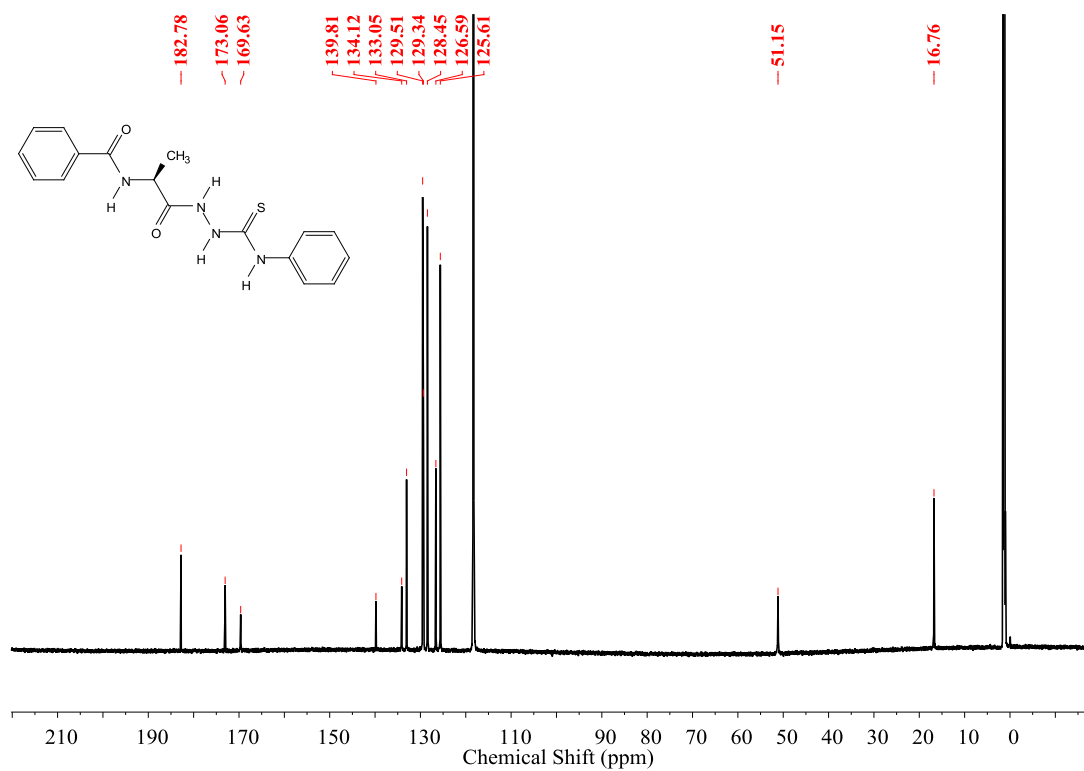



<sup>1</sup>H NMR of D-**1H** (500 MHz, DMSO-*d*<sub>6</sub>)

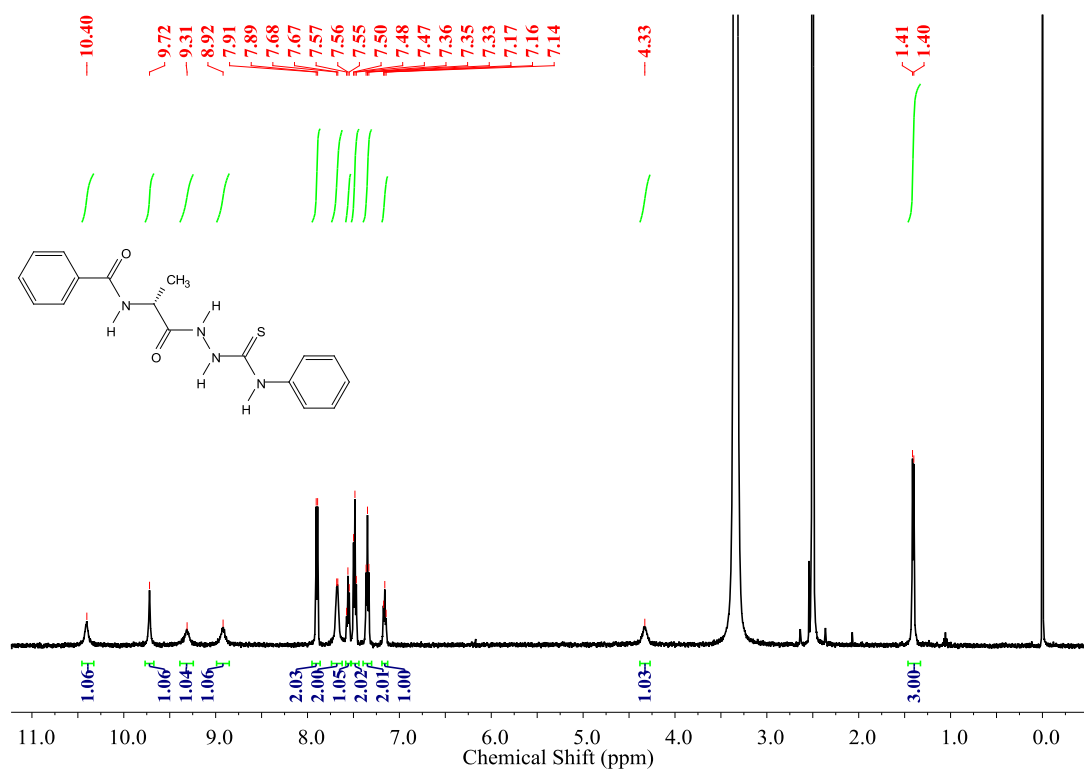

<sup>13</sup>C NMR of D-**1H** (214 MHz, CD<sub>3</sub>CN)

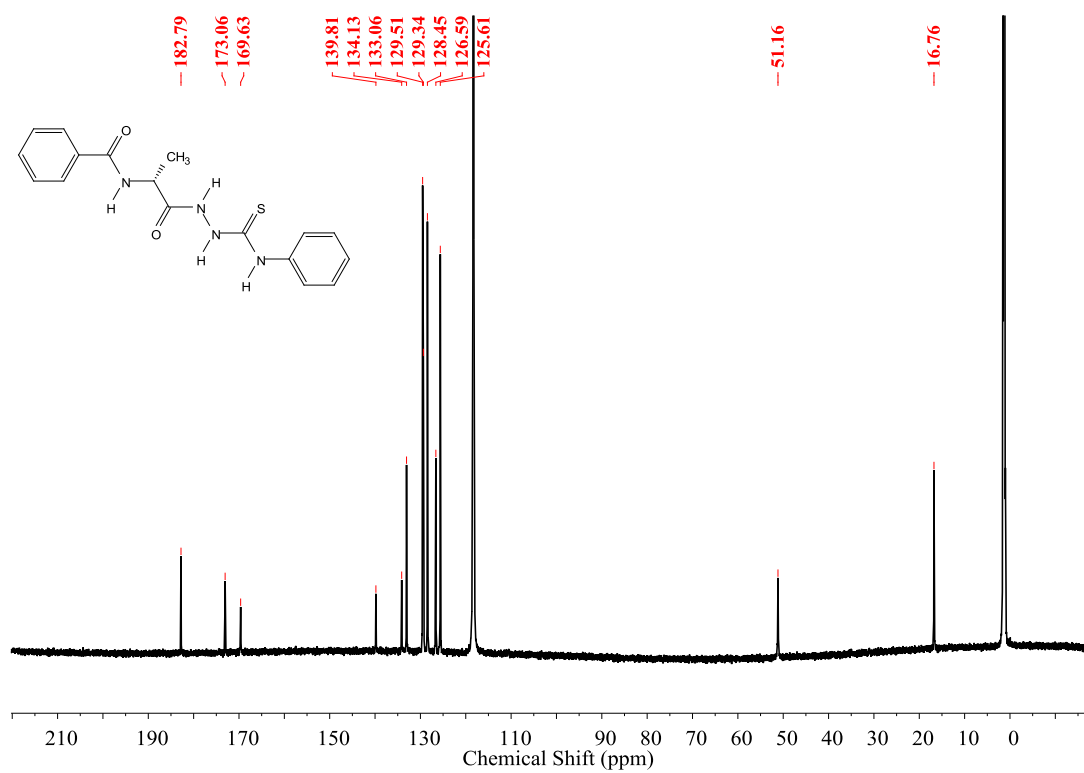

<sup>1</sup>H NMR of L-2I (500 MHz, DMSO-d<sub>6</sub>)

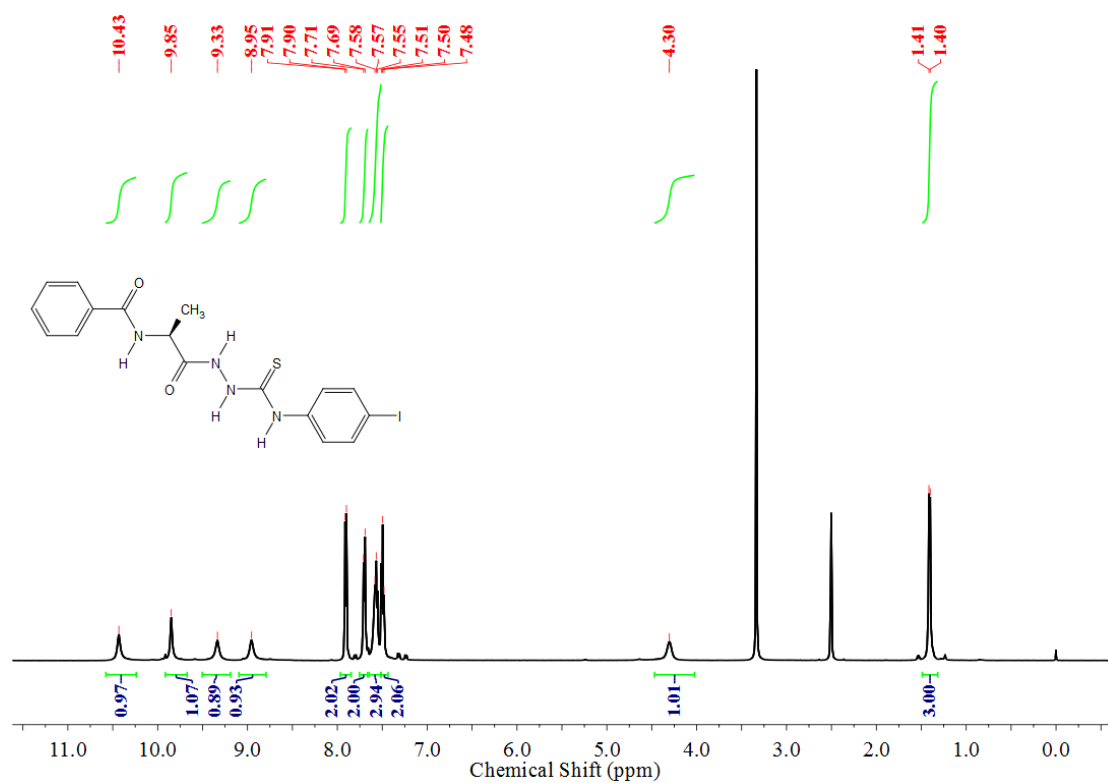

<sup>13</sup>C NMR of L-2I (214 MHz, DMSO-d<sub>6</sub>)

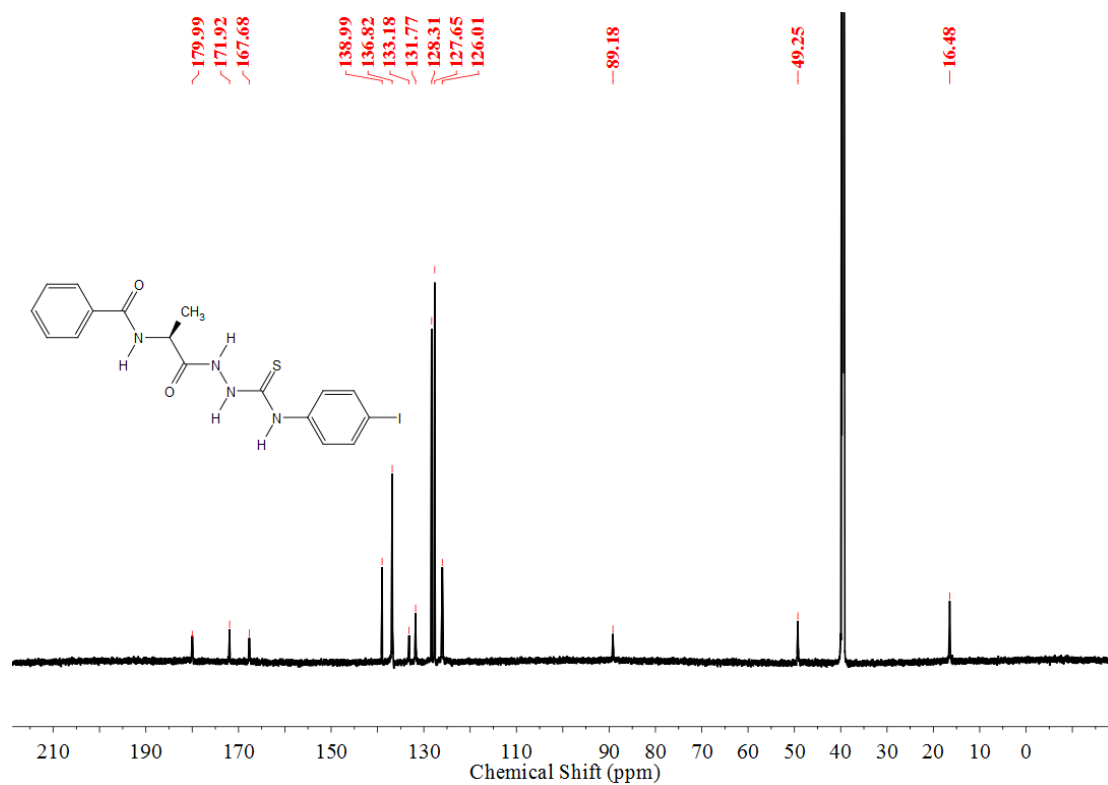

<sup>1</sup>H NMR of D-**2I** (500 MHz, DMSO-*d*<sub>6</sub>)

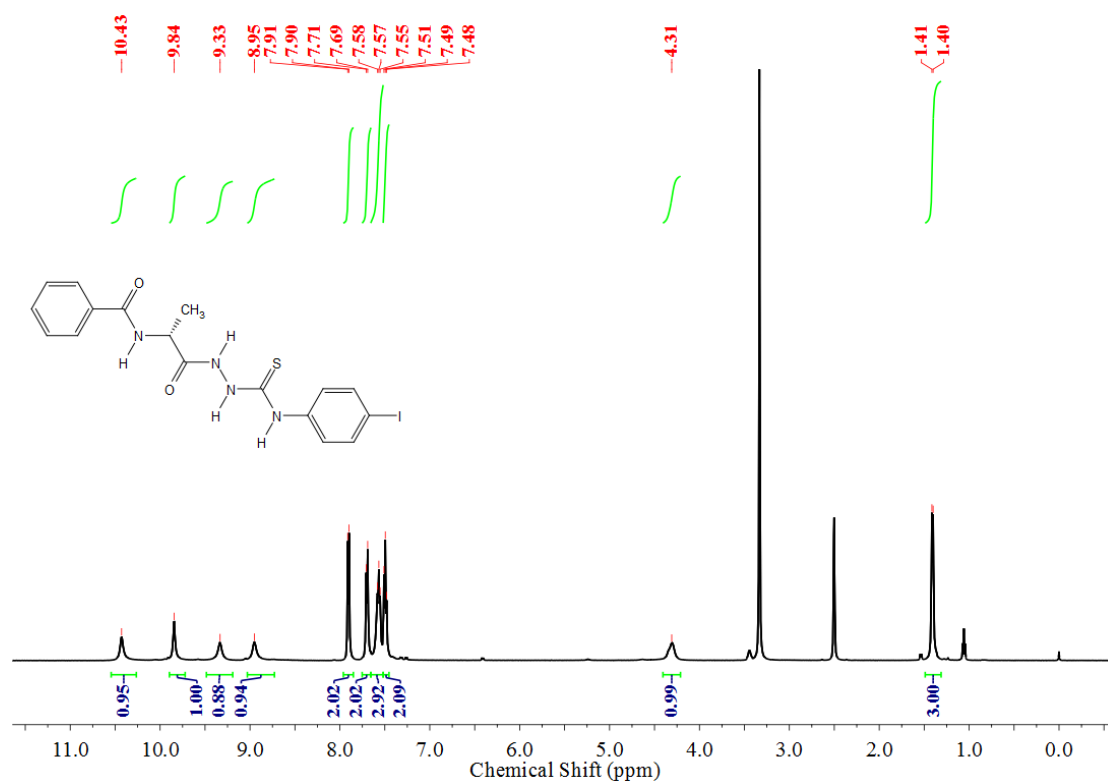

<sup>13</sup>C NMR of D-**2I** (214 MHz, DMSO-*d*<sub>6</sub>)

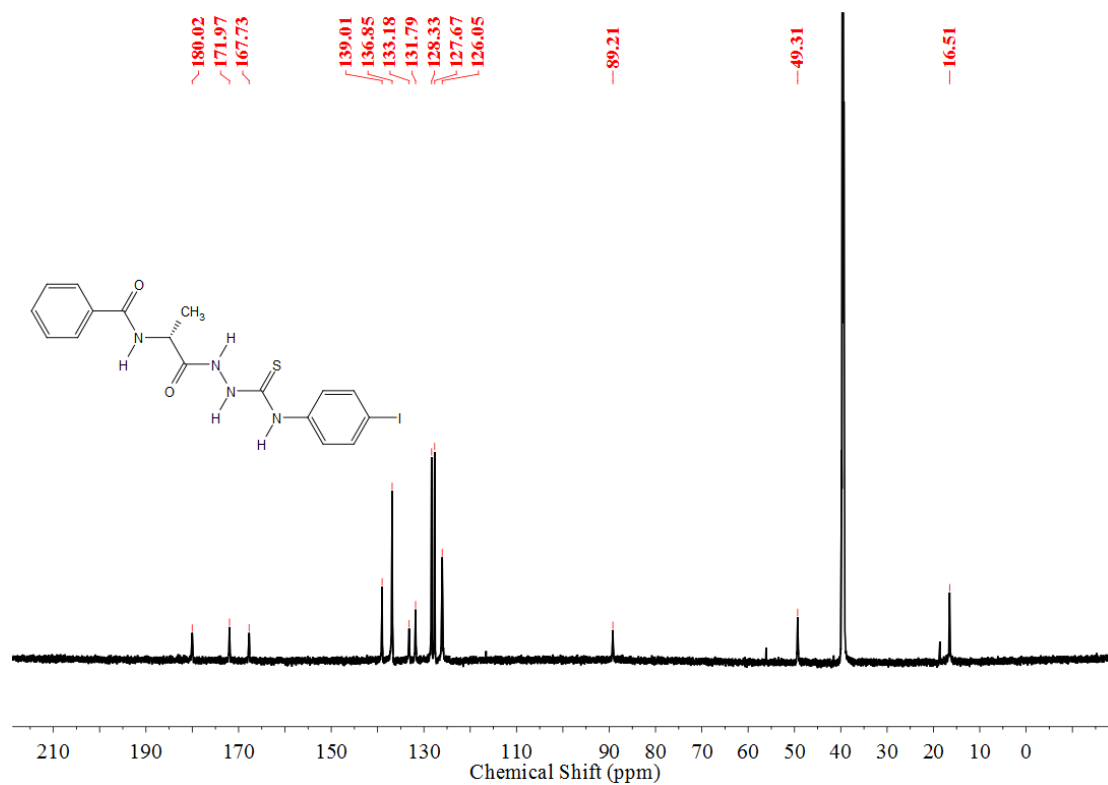

<sup>1</sup>H NMR of L-3I (500 MHz, DMSO-*d*<sub>6</sub>)

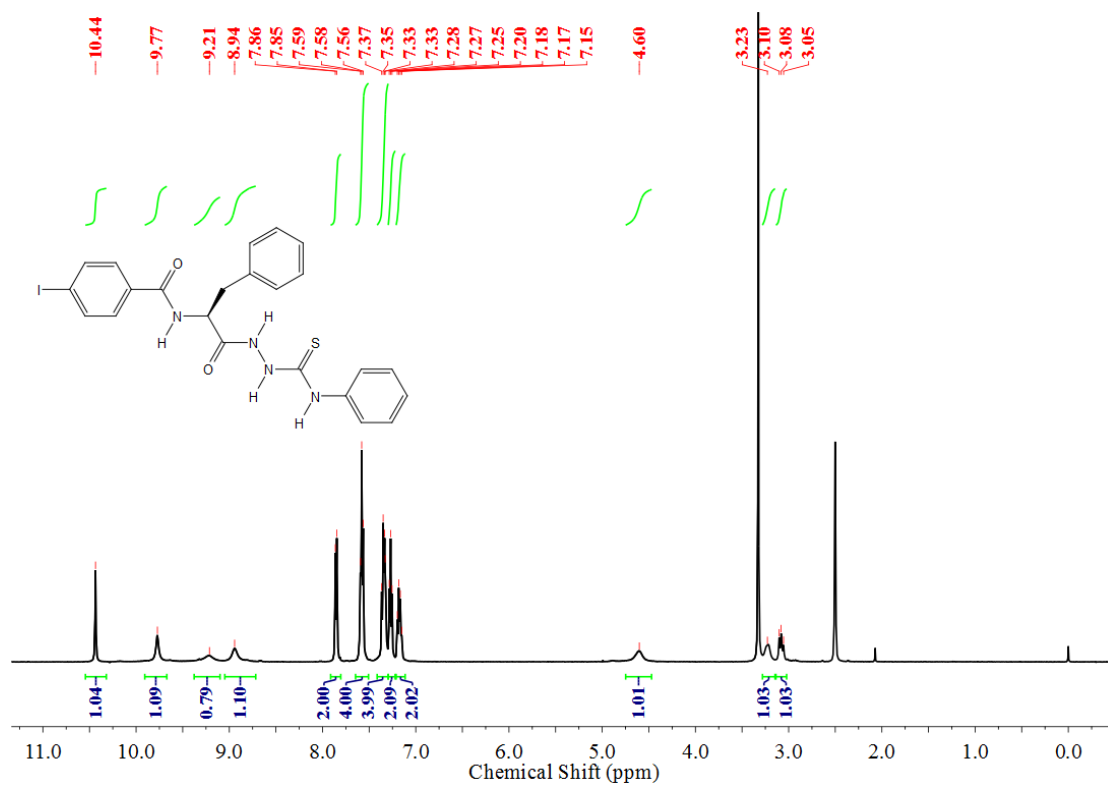

<sup>13</sup>C NMR of L-3I (151 MHz, DMSO-*d*<sub>6</sub>)

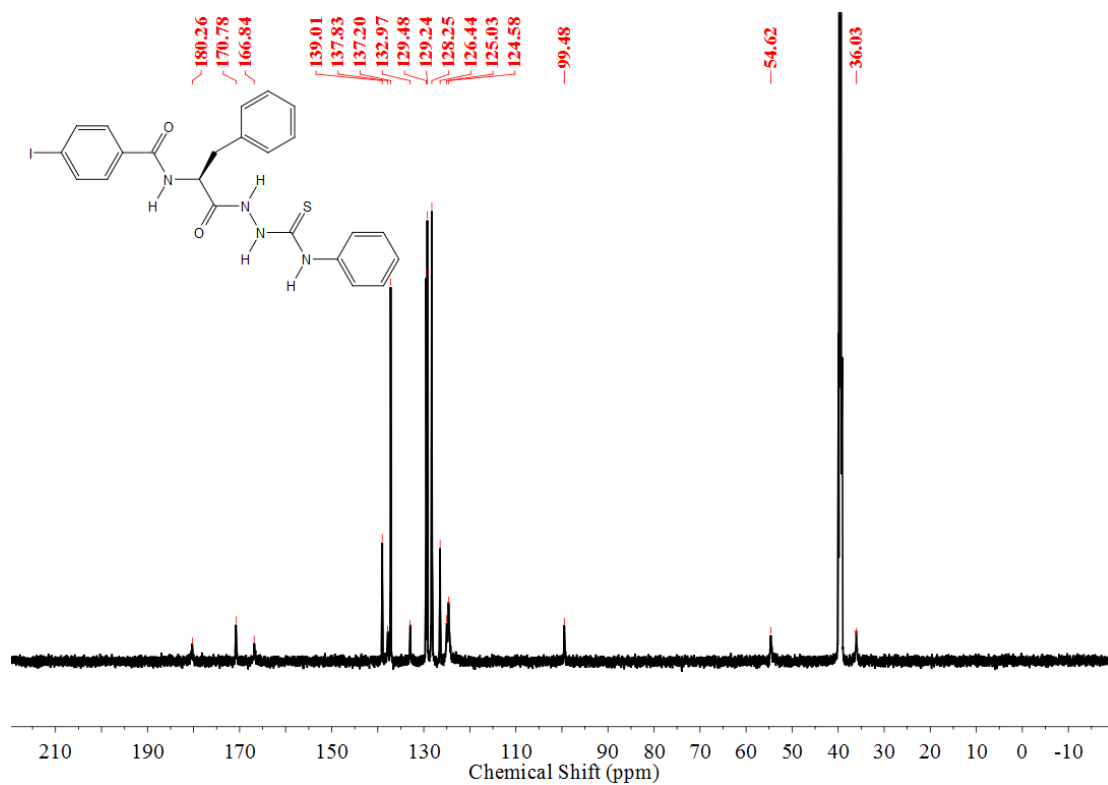

<sup>1</sup>H NMR of D-3I (600 MHz, DMSO-*d*<sub>6</sub>)

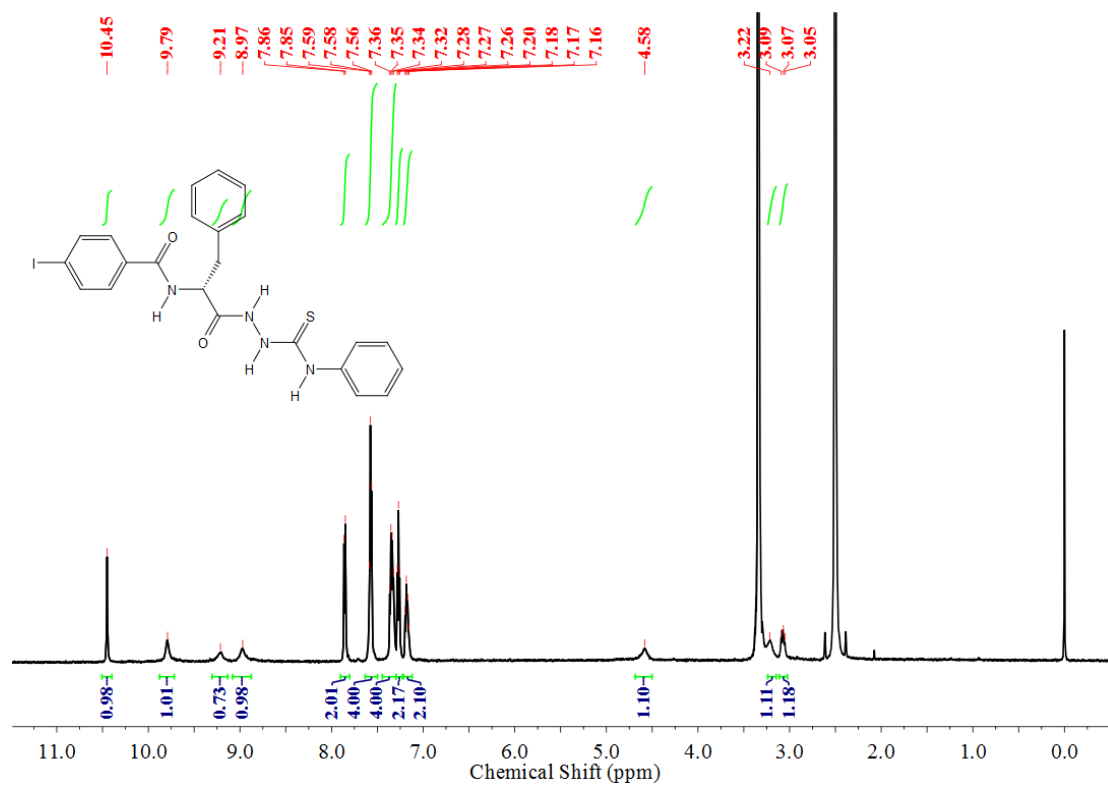

<sup>13</sup>C NMR of D-3I (126 MHz, DMSO-*d*<sub>6</sub>)

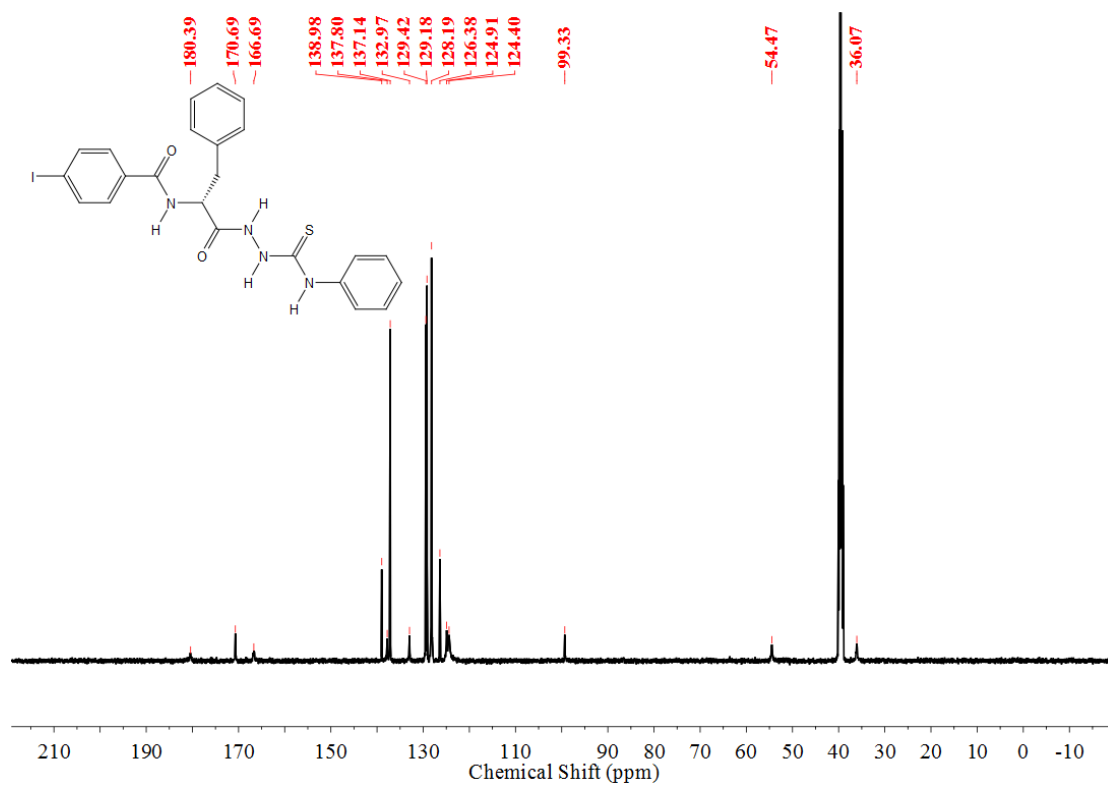

#### 4. References

- S1. Yan, X.; Zou, K.; Cao, J.; Li, X.; Zhao, Z.; Li, Z.; Wu, A.; Liang, W.; Mo, Y.; Jiang, Y. Single-handed supramolecular double helix of homochiral bis(*N*-amidothiourea) supported by double crossed C–I⋯S halogen bonds. *Nat. Commun.* **2019**, *10*, 3610.
- S2. Koch, O. Advances in the Prediction of Turn Structures in Peptides and Proteins. *Mol. Inf.* **2012**, *31*, 624-630.
- S3. Copeland, G. T.; Jarvo, E. R.; Miller, S. J. Minimal Acylase-Like Peptides. Conformational Control of Absolute Stereospecificity. *J. Org. Chem.* **1998**, *63*, 6784-6785.
- S4. van Enkevort, W. J. P. On the Crystallization of Epitaxial Racemic Conglomerates. *J. Phys. Chem. C* **2010**, *114*, 21593-21604.
- S5. Spix, L.; Alfring, A.; Meeke, H.; van Enkevort, W. J. P.; Vlieg, E., Formation of a Salt Enables Complete Deracemization of a Racemic Compound through Viedma Ripening. *Cryst. Growth Des.* **2014**, *14*, 1744-1748.
